# Supplementary material for: Entropy-Enthalpy Compensations Fold Proteins in Precise Ways
Source: Int J Mol Sci. 2021 Sep 6;22(17):9653. doi: 10.3390/ijms22179653 (PMC8431812; doi:10.3390/ijms22179653)
Supplement: Supplementary file 1 [file ijms-22-09653-s001.zip]

Archive with 6 entries (6 files):
- Supplementary1.pdf
- Supplementary2.pdf
- Supplementary3.xlsx
- Supplementary4.xlsx
- Supplementary5.zip
- Supplementary6.pdf
