# Supplementary material for: Entropy-Enthalpy Compensations Fold Proteins in Precise Ways
Source: Int J Mol Sci. 2021 Sep 6;22(17):9653. doi: 10.3390/ijms22179653 (PMC8431812; doi:10.3390/ijms22179653)
Supplement: Supplementary file 1 [file ijms-22-09653-s001.zip › Supplementary1.pdf]

# Supplementary Information

**Table S1.** 1000 randomly selected small protein structures in PDB (PDBID).

|      |      |      |      |      |      |      |      |      |      |
|------|------|------|------|------|------|------|------|------|------|
| 134L | 1KP4 | 1Z3L | 3C3G | 4IC9 | 1FDD | 1R75 | 2OAI | 3OZZ | 5HBP |
| 155C | 1KSM | 1Z3M | 3C4S | 4IDL | 1FE3 | 1R9H | 2OJR | 3P2X | 5HBQ |
| 1A0B | 1KTH | 1Z3P | 3C5K | 4IP1 | 1FE5 | 1RAQ | 2OLI | 3PAZ | 5HDG |
| 1A18 | 1KXI | 1ZIA | 3C7I | 4IP6 | 1FER | 1RBI | 2ON8 | 3Q1D | 5HJC |
| 1A6F | 1KXW | 1ZIB | 3C97 | 4IPF | 1FES | 1RBW | 2OPY | 3Q4Y | 5HKN |
| 1AA2 | 1KXX | 1ZJ7 | 3CE8 | 4JHB | 1FEV | 1RBX | 2OQK | 3Q7Y | 5HMB |
| 1AB0 | 1KXY | 1ZPA | 3CEC | 4JJD | 1FF2 | 1RDS | 2OSN | 3QD7 | 5HPA |
| 1ACD | 1L5D | 208L | 3CQ1 | 4JZ3 | 1FIK | 1REX | 2OUB | 3R3K | 5HQI |
| 1ACF | 1L7L | 2A3G | 3CR2 | 4JZP | 1FKD | 1RFP | 2OUM | 3R5P | 5HVZ |
| 1AE2 | 1LAC | 2A7B | 3CR5 | 4K1V | 1FKF | 1RH2 | 2OXK | 3RH1 | 5I72 |
| 1AF5 | 1LCJ | 2A9I | 3CTG | 4K59 | 1FKK | 1RLK | 2OYZ | 3RHE | 5J6X |
| 1AHO | 1LEA | 2A9Q | 3CYI | 4KGT | 1FKV | 1RMD | 2OZ9 | 3RNT | 5JOE |
| 1ALB | 1LGP | 2AIF | 3DJN | 4KUO | 1FLQ | 1RNN | 2P0D | 3RSD | 5K2L |
| 1ANG | 1LKL | 2APB | 3DJU | 4KV4 | 1FLU | 1RNQ | 2P0F | 3RSK | 5KAZ |
| 1ANU | 1LOZ | 2AZ8 | 3DML | 4LBB | 1FLW | 1RNU | 2P1X | 3RTO | 5KM6 |
| 1AOJ | 1LPI | 2AZ9 | 3DP5 | 4LFQ | 1FLY | 1RNV | 2P2E | 3RVC | 5KUE |
| 1AQT | 1LRA | 2AZB | 3EAZ | 4LFS | 1FN5 | 1RNW | 2P61 | 3S3Y | 5KXF |
| 1AWJ | 1LSL | 2B1Y | 3ENU | 4LJN | 1FNJ | 1RNX | 2P64 | 3S8S | 5L8Z |
| 1AYC | 1LVE | 2B29 | 3ERS | 4LTT | 1FNK | 1RNZ | 2P6V | 3S9K | 5LAW |
| 1B0T | 1LXI | 2B4A | 3ETW | 4LYO | 1FOW | 1RRI | 2P8V | 3SGP | 5LAZ |
| 1B1E | 1LYO | 2B8G | 3EZM | 4MDQ | 1FOY | 1RRY | 2PAL | 3STM | 5LN2 |
| 1B1I | 1LZ4 | 2B9D | 3F3Q | 4MJJ | 1G2S | 1RS2 | 2PK7 | 3SUL | 5M9A |
| 1B1J | 1M1S | 2BEZ | 3F45 | 4ML2 | 1GBQ | 1RSI | 2PKT | 3T1X | 5MXY |
| 1B1U | 1M4A | 2BFH | 3F8C | 4MZ2 | 1GD6 | 1RTU | 2PNE | 3T3J | 5NGN |
| 1B2O | 1M4B | 2BHK | 3FAJ | 4N0Z | 1GDC | 1RWJ | 2PPI | 3T8R | 5NWX |
| 1B6E | 1M4M | 2BHO | 3FFY | 4N5T | 1GHJ | 1RZY | 2PPN | 3T8T | 5O3A |
| 1BAS | 1MB3 | 2BO1 | 3FRV | 4N6J | 1GKH | 1S3P | 2PVT | 3UAF | 5OC4 |
| 1BEA | 1MG6 | 2BPP | 3FWU | 4NEJ | 1GMG | 1S7I | 2PW5 | 3UB2 | 5OC8 |
| 1BEL | 1MH7 | 2BQQ | 3FYR | 4NXR | 1GOD | 1SDZ | 2PWS | 3UB3 | 5OMD |
| 1BFE | 1MH8 | 2BRF | 3FZ9 | 4OOH | 1GP3 | 1SF6 | 2PYK | 3UB4 | 5PAL |
| 1BGI | 1MK0 | 2BS5 | 3FZA | 4OV1 | 1GS3 | 1SF7 | 2PZW | 3UMD | 5PAZ |
| 1BHF | 1MKU | 2BTI | 3G7C | 4OXW | 1GSW | 1SFB | 2Q1M | 3UME | 5RHN |
| 1BKF | 1ML8 | 2BWK | 3GBQ | 4OZL | 1GV2 | 1SFG | 2QAS | 3UNN | 5RNT |
| 1BKV | 1MLI | 2BWL | 3GK2 | 4P15 | 1GVP | 1SKZ | 2QDB | 3V19 | 5TAB |
| 1BM2 | 1N9N | 2BZY | 3GK4 | 4P2P | 1GXT | 1SNP | 2QHE | 3V1G | 5U9U |
| 1BMG | 1N9O | 2CDS | 3GKY | 4P7U | 1H2P | 1SNQ | 2QHW | 3VXW | 5UEP |
| 1BO0 | 1NEH | 2COQ | 3GLW | 4P9E | 1HD0 | 1SSC | 2QIU | 3VYA | 5UER |
| 1BPQ | 1NEQ | 2CW4 | 3GM2 | 4P9V | 1HE7 | 1SV9 | 2QNW | 3WIT | 5UES |
| 1BQK | 1NKO | 2CXY | 3GM3 | 4PAZ | 1HEH | 1T00 | 2QR3 | 3WRP | 5UET |
| 1BQR | 1NLO | 2D4L | 3GQU | 4PE7 | 1HEY | 1T1D | 2QVT | 3WUN | 5UEV |
| 1BU3 | 1NN7 | 2D4M | 3GSP | 4PTA | 1HFX | 1T2J | 2R2Y | 3WVT | 5UEY |
| 1BXY | 1NNX | 2D58 | 3H33 | 4QYW | 1HIK | 1TAY | 2R34 | 3WW5 | 5USV |
| 1BYL | 1NXT | 2DB7 | 3H9W | 4RLM | 1HKF | 1TCY | 2R36 | 3WX4 | 5UVS |
| 1C0B | 1NXV | 2DH1 | 3HAF | 4RLN | 1HME | 1TDY | 2R39 | 3ZEK | 5UVY |
| 1C0C | 1O2E | 2DP9 | 3HAK | 4RUD | 1HQ8 | 1TEN | 2REA | 3ZK0 | 5UVZ |
| 1C76 | 1O3X | 2DRT | 3HEY | 4TQN | 1HQB | 1TGJ | 2REY | 4AHG | 5VEA |

|      |      |      |      |      |      |      |      |      |      |
|------|------|------|------|------|------|------|------|------|------|
| 1C9H | 1O41 | 2DU9 | 3HFF | 4TS8 | 1HRC | 1TNS | 2RKN | 4AHI | 5VR3 |
| 1C9V | 1O42 | 2DYQ | 3HFN | 4UNG | 1HRQ | 1TS9 | 2RLN | 4AHN | 5WOR |
| 1CDP | 1O43 | 2EFF | 3HJX | 4UNV | 1HSQ | 1TUW | 2RNS | 4AQI | 5WPB |
| 1CDT | 1O44 | 2EG2 | 3HNU | 4UTQ | 1I07 | 1TVQ | 2SAK | 4AQJ | 5WRB |
| 1CHN | 1O45 | 2EH9 | 3HQA | 4WBF | 1I0C | 1TXA | 2UUX | 4AYA | 5XUK |
| 1CI6 | 1O47 | 2EQL | 3HQB | 4WO6 | 1I0V | 1U36 | 2UZR | 4B9J | 5XWE |
| 1CKA | 1O4A | 2ES9 | 3I3Z | 4X1L | 1I3Z | 1U3J | 2V5F | 4BFN | 5YDN |
| 1CM3 | 1O4C | 2EYW | 3I7T | 4X1M | 1I9E | 1U3Y | 2V6H | 4BS7 | 5YI1 |
| 1COF | 1O4E | 2F3L | 3I7W | 4XC4 | 1IDI | 1U3Z | 2VJW | 4CGQ | 5YM7 |
| 1CS3 | 1O4G | 2F4G | 3I7X | 4XO2 | 1IGU | 1U42 | 2VKS | 4CPV | 5ZND |
| 1CUO | 1O4H | 2F4K | 3I7Y | 4XXL | 1IIZ | 1U68 | 2VP7 | 4CQI | 6B25 |
| 1CYI | 1O4I | 2FB0 | 3IE9 | 4Y92 | 1IJ0 | 1U9R | 2VSD | 4DH0 | 6BBK |
| 1D1M | 1O4J | 2FCD | 3IJU | 4YM8 | 1IJ1 | 1UHD | 2VSL | 4DH4 | 6BSY |
| 1DAQ | 1O4K | 2FD2 | 3IN2 | 4YOP | 1IJ2 | 1UIA | 2W1R | 4DP0 | 6CE6 |
| 1DCF | 1O4L | 2FKE | 3INC | 4YX5 | 1IKL | 1UIC | 2W51 | 4DP1 | 6CE8 |
| 1DDV | 1O4M | 2FKL | 3IRC | 4ZC3 | 1IOR | 1UID | 2WOR | 4DP2 | 6CEA |
| 1DDW | 1O4N | 2FLS | 3J4G | 5AEF | 1IOS | 1UIE | 2WOS | 4DP4 | 6CEC |
| 1DKJ | 1O4O | 2FLT | 3JTE | 5AFG | 1IOT | 1UIF | 2WQ0 | 4E1P | 6CED |
| 1DMM | 1O4Q | 2FMB | 3JZR | 5AI2 | 1IR7 | 1UIG | 2WQ3 | 4E1R | 6CEE |
| 1DMN | 1O4R | 2FO3 | 3K0X | 5B1F | 1IR8 | 1UKU | 2WQH | 4EC2 | 6CEF |
| 1DMQ | 1O5J | 2FQL | 3K63 | 5B1G | 1IR9 | 1UPJ | 2X44 | 4EES | 6DXH |
| 1DPY | 1O7Z | 2FTB | 3K6D | 5B3Q | 1IRQ | 1UPR | 2X9C | 4ET8 | 6DXR |
| 1DQ7 | 1OAP | 2GSP | 3K9I | 5B52 | 1IRW | 1UVY | 2XBD | 4ET9 | 6EKB |
| 1DYZ | 1OB6 | 2GV2 | 3KD0 | 5B79 | 1ISU | 1UW3 | 2XCZ | 4ETA | 6EVL |
| 1DZ0 | 1OD7 | 2H2B | 3KHQ | 5BMH | 1IYU | 1UW7 | 2XDY | 4ETB | 6EVM |
| 1E5B | 1ODA | 2H36 | 3KLU | 5BPO | 1IZA | 1UWM | 2XFE | 4ETD | 6FCE |
| 1E6K | 1OOI | 2H46 | 3KMJ | 5C39 | 1J2V | 1V07 | 2XKH | 4ETE | 6FGL |
| 1E6L | 1OPY | 2H8A | 3KQ6 | 5C4P | 1J4H | 1V46 | 2XMU | 4EWW | 6FGT |
| 1E6M | 1OR5 | 2H8V | 3KQI | 5C68 | 1J4I | 1VAT | 2YHN | 4EWZ | 6FGU |
| 1E97 | 1P0R | 2H95 | 3KTP | 5C6X | 1J73 | 1VED | 2YWZ | 4EX0 | 6FH6 |
| 1EA2 | 1P65 | 2HB4 | 3KU7 | 5CB9 | 1J7Z | 1VER | 2YXY | 4F1A | 6FH7 |
| 1ECW | 1P9G | 2HC8 | 3KVT | 5CO9 | 1J81 | 1VHF | 2Z44 | 4F2E | 6FXF |
| 1ED1 | 1PAL | 2HPL | 3L1M | 5CPV | 1J82 | 1VIH | 2Z7J | 4F68 | 6GF0 |
| 1EFQ | 1PAZ | 2HWV | 3L6W | 5CUL | 1JC7 | 1VMG | 2ZGD | 4F69 | 6H0K |
| 1EIF | 1PBI | 2I9V | 3LHC | 5D53 | 1JDL | 1W2L | 2ZHH | 4F6D | 6H0L |
| 1EIG | 1PI8 | 2IGP | 3LJM | 5D54 | 1JER | 1W6X | 3A0D | 4FC1 | 6HA4 |
| 1EMN | 1PKS | 2IY  | 3LLH | 5DKN | 1JHC | 1WAQ | 3A0S | 4FDX | 6I3S |
| 1EN2 | 1PO8 | 2INT | 3LMF | 5DM9 | 1JKD | 1WHI | 3A0V | 4FE6 | 6I5A |
| 1ENV | 1PZ4 | 2J5A | 3LR0 | 5DZD | 1JOI | 1WJG | 3A7L | 4G3O | 6IFH |
| 1EOQ | 1PZA | 2JIN | 3LVE | 5E0Z | 1JON | 1WJX | 3ADY | 4G4W | 6INS |
| 1EOT | 1PZB | 2JK7 | 3LYO | 5E4P | 1JPE | 1WRP | 3AZ5 | 4G4X | 6IQC |
| 1EOW | 1PZC | 2JP8 | 3LZ2 | 5E4X | 1JPO | 1WY9 | 3B7X | 4GBC | 6JQ4 |
| 1EQV | 1Q4R | 2JVH | 3M4T | 5EE2 | 1JZA | 1XW3 | 3B84 | 4GBN | 6MHN |
| 1EV3 | 1Q4V | 2KRI | 3MAZ | 5EH4 | 1K1Z | 1XW4 | 3BF2 | 4GFY | 6MPM |
| 1F1W | 1Q7O | 2LYO | 3MCD | 5EN9 | 1K40 | 1Y49 | 3BI9 | 4GQV | 6NF3 |
| 1FAO | 1Q8B | 2M6D | 3MF8 | 5ER4 | 1K58 | 1Y9T | 3BIA | 4GSP | 6PAZ |
| 1FAV | 1QFI | 2M6E | 3MYA | 5ET3 | 1K5A | 1YAT | 3BJO | 4HB6 | 6Q5K |
| 1FAZ | 1QKF | 2M6G | 3NGR | 5FD1 | 1KC2 | 1YEA | 3BKS | 4HE7 | 6QQJ |
| 1FB7 | 1QL2 | 2M6H | 3NRW | 5FG4 | 1KCQ | 1YEB | 3BOV | 4HMB | 6RLX |
| 1FB8 | 1QLS | 2MSS | 3NZ3 | 5G25 | 1KH0 | 1YGT | 3BY5 | 4HP9 | 6RNT |
| 1FD2 | 1QPV | 2NUH | 3O70 | 5GSP | 1KH8 | 1YMV | 3BYR | 4HRS | 7PAZ |

|      |      |      |      |      |      |      |      |      |      |
|------|------|------|------|------|------|------|------|------|------|
| 1FD8 | 1QSU | 2O0P | 3O8W | 5H0Y | 1KJT | 1YV7 | 3BZS | 4HV2 | 8PAZ |
| 1FDA | 1QTO | 2O0Q | 3ONH | 5HBL | 1KM8 | 1YVS | 3C12 | 4I3I | 9RAT |
| 1FDB | 1R26 | 2O1N | 3OSE | 5HBO | 1KM9 | 1Z21 | 3C1R | 4IAS | 9RNT |

**Table S2.** Amino acid sequences of  $\beta$ -turns of the 1000 protein samples.

|                |       |             |              |        |       |      |                |             |             |             |      |             |     |             |             |             |             |      |      |    |
|----------------|-------|-------------|--------------|--------|-------|------|----------------|-------------|-------------|-------------|------|-------------|-----|-------------|-------------|-------------|-------------|------|------|----|
| PDBID:1A<br>A2 |       |             |              |        |       |      | PDBID:1NX<br>V |             |             |             |      |             |     |             |             |             |             |      |      |    |
| AGYPNV         | NFT   | RDG         | RPDLI        | KKSN   | TKL   | VDHP | PD             | LMLPEI<br>D | AD          | KPF         |      |             |     |             |             |             |             |      |      |    |
| PDBID:1A<br>CF |       |             |              |        |       |      | PDBID:1O4<br>2 |             |             |             |      |             |     |             |             |             |             |      |      |    |
| NL             | GAVT  | LDG         | SAGF         | AG     | DDR   | GS   | EEW            | KI          | NAEN<br>PRG | SETTKG<br>A | NAK  | LDSG        | SR  |             |             |             |             |      |      |    |
| TSK            | NEKI  |             |              |        |       |      | ADGLCHR        |             |             |             |      |             |     |             |             |             |             |      |      |    |
| PDBID:1A<br>OJ |       |             |              |        |       |      | PDBID:1O4<br>C |             |             |             |      |             |     |             |             |             |             |      |      |    |
| NSS            | MKD   | ASG         | NNI          | TPE    | NSSE  | MKD  | EEW            | KI          | NAEN<br>PRG | SETTKG<br>A | NAK  | LDSG        | SR  |             |             |             |             |      |      |    |
| DDRR           | NASG  |             |              |        |       |      | ADGLCHR        |             |             |             |      |             |     |             |             |             |             |      |      |    |
| PDBID:1A<br>YC |       |             |              |        |       |      | PDBID:1O4J     |             |             |             |      |             |     |             |             |             |             |      |      |    |
| RRW            | HPNI  | VDG         | KSNPG        | NG     | TGDY  | LYGG | EEW            | KI          | NAEN<br>PRG | SETTKG      | NAK  | LDSG        | SR  |             |             |             |             |      |      |    |
| HHGQ           | KNG   |             |              |        |       |      | ADGLCHR        |             |             |             |      |             |     |             |             |             |             |      |      |    |
| PDBID:1B<br>U3 |       |             |              |        |       |      | PDBID:1O4<br>N |             |             |             |      |             |     |             |             |             |             |      |      |    |
| AFSGILA        | AADS  | DQDK        | SAGA         | DSDG   |       |      | SIQAEEW        | KI          | NAEN<br>PRG | SETTKG<br>A | NAK  | LDSG        | SR  |             |             |             |             |      |      |    |
| PDBID:1C<br>KA |       |             |              |        |       |      | ADGLCHR        |             |             |             |      |             |     |             |             |             |             |      |      |    |
| DEE            | KKG   | KPEEQ       | DSEG         |        |       |      | PDBID:1O4<br>O |             |             |             |      |             |     |             |             |             |             |      |      |    |
| PDBID:1FB<br>7 |       |             |              |        |       |      | SIQAEEW        |             |             |             |      |             |     |             | KI          | NAEN<br>PRG | SETTKG<br>A | NAK  | LDSG | SR |
| LWQR           | GG    | DTGA        | IG           | CG     | PTPVN |      | ADGLCHR        |             |             |             |      |             |     |             |             |             |             |      |      |    |
| PDBID:1FB<br>8 |       |             |              |        |       |      | PDBID:1OD<br>7 |             |             |             |      |             |     |             |             |             |             |      |      |    |
| SLGT           | GGLVK | RN          | KDQMS        | YSQERV | PF    |      |                | PK          | LSG         | PADV        | VSNG | DYS-<br>GKR | SGD | DKRFR<br>GR |             |             |             |      |      |    |
| PDBID:1FE<br>S |       |             |              |        |       |      | KD             |             |             |             |      |             |     |             | DS          | DVKG        |             |      |      |    |
| CSGCSGA        |       |             |              |        |       |      | PDBID:1OD<br>A |             |             |             |      |             |     |             |             |             |             |      |      |    |
| PDBID:1F<br>NK |       |             |              |        |       |      | PADV           |             |             |             |      |             |     |             | DYS-<br>GKR | SGDPK<br>LV | RGR         | MDHK | KD   | DS |
| RDT            | TPDL  | LSGWQ<br>YV | VTG-<br>GLKK |        |       |      | DVKG           |             |             |             |      |             |     |             |             |             |             |      |      |    |
| PDBID:1F<br>OY |       |             |              |        |       |      | PDBID:1PK<br>S |             |             |             |      |             |     |             |             |             |             |      |      |    |
| TFIT           | PDL   | SMG         |              |        |       |      |                | LYD         | REE         | HLG         | SDG  |             |     |             |             |             |             |      |      |    |
| PDBID:1G<br>BQ |       |             |              |        |       |      | PDBID:1PO<br>8 |             |             |             |      |             |     |             |             |             |             |      |      |    |

|            |         |       |        |      |       |     |  |            |         |      |      |       |      |         |
|------------|---------|-------|--------|------|-------|-----|--|------------|---------|------|------|-------|------|---------|
| ADD        | KRGD    | DQN   | NG     | KNY  |       |     |  | GCY        | IDGC    | EP   | DSKD |       |      |         |
| PDBID:1GVP |         |       |        |      |       |     |  | PDBID:1PZA |         |      |      |       |      |         |
| KPSQA      | SRQG    | NEYP  | DEGQ   | GQFG | DRL   |     |  | AE         | PA      | NPG  | VDK  | IKDM  | PEGA | KINE    |
| PDBID:1J2V |         |       |        |      |       |     |  | CTPH       | GDSP    |      |      |       |      |         |
| EG         | YDVP    | NED   |        |      |       |     |  | PDBID:1PZB |         |      |      |       |      |         |
| PDBID:1J4I |         |       |        |      |       |     |  | AE         | PA      | NPG  | VDK  | IKDM  | PEGA | KINE    |
| DGRT       | KRG     | EDG   | GKQEV  | ISVG | ATG   | PGI |  | CTPH       | GDSP    |      |      |       |      |         |
| PPH        |         |       |        |      |       |     |  | PDBID:1RNQ |         |      |      |       |      |         |
| PDBID:1J82 |         |       |        |      |       |     |  | DSSTS      | NLT-KDR | CKNG | TGSS | YP    | GNPY |         |
| NLTKDR     | CKNG    | TGSS  | YP     | GNPY |       |     |  | PDBID:1RNV |         |      |      |       |      |         |
| PDBID:1K5A |         |       |        |      |       |     |  | NLTKDR     | CKNG    | TGSS | YP   | GNPY  |      |         |
| DAKPQGR    | LTSPCKD | ENKN  | REN    | WPPC | NG    | QSA |  | PDBID:1RNX |         |      |      |       |      |         |
| PDBID:1LEA |         |       |        |      |       |     |  | DSSTS      | NLT-KDR | CKNG | TGSS | YP    | GNPY |         |
| FRS        | VSGAS   |       |        |      |       |     |  | PDBID:1RRI |         |      |      |       |      |         |
| PDBID:1LGP |         |       |        |      |       |     |  | YNR        | ENPPI   |      |      |       |      |         |
| RLGAEE-GE  | KR      | RRGCD | DEKSG  | STSG | VKKQ  | QTG |  | PDBID:1UIG |         |      |      |       |      |         |
| YRKNE      |         |       |        |      |       |     |  | LDN        | NF      | TQA  | NTDG | GILQ  | SRWW | DGRTPGS |
| PDBID:1MH8 |         |       |        |      |       |     |  | NLCN       | SSD     | DGN  | KGTD | RGC   |      |         |
| VPAR       | GCY     | QG    | KGRN   | NI   |       |     |  | PDBID:1UW7 |         |      |      |       |      |         |
| PDBID:1MK0 |         |       |        |      |       |     |  | PNN        | TTQTAC  | NSKG | HQDL | KSDG  | TPKG | KGL     |
| TLNN       | KD      | HSS   | GNV    | PYE  | NSKIN |     |  | PDBID:1WJG |         |      |      |       |      |         |
| PDBID:1NLO |         |       |        |      |       |     |  | FK         | PDYL    | GTRG | SLFL |       |      |         |
| LYD        | TET     | KKG   | NTEGD  | LTTG |       |     |  | PDBID:2BEZ |         |      |      |       |      |         |
| PDBID:1NNX |         |       |        |      |       |     |  | NVLY       | ISGI    | NESL |      |       |      |         |
| RDD        | DD      | AS    | WNGV   | TPKD | WN    |     |  | PDBID:2BPP |         |      |      |       |      |         |
| PDBID:1O4E |         |       |        |      |       |     |  | IPSS       | NN      | GCY  | KVL  | NPYTN | NN   | SSEN    |
| EEW        | KI      | NAENP | SETTKG | NAK  | LD    | SR  |  | NL         |         |      |      |       |      |         |
| ADGLCH     |         |       |        |      |       |     |  | PDBID:2BTI |         |      |      |       |      |         |
| R          |         |       |        |      |       |     |  |            |         |      |      |       |      |         |
| PDBID:1OPY |         |       |        |      |       |     |  | VG         | GDE     | GN   | PKEV | VG    | GDE  | GN      |
| DPFGQ      | SHNG    | NG    | DEHG   |      |       |     |  | PKEV       |         |      |      |       |      |         |
| PDBID:1P9G |         |       |        |      |       |     |  | PDBID:2CXY |         |      |      |       |      |         |

|                   |       |       |         |             |              |            |                  |             |             |              |          |            |             |
|-------------------|-------|-------|---------|-------------|--------------|------------|------------------|-------------|-------------|--------------|----------|------------|-------------|
| CRP<br>PDBID:1RDS | NAG   | IYG   | GAGN    |             |              |            | GK<br>PDBID:2DH1 | PEV         |             |              |          |            |             |
| GS                | DD    | DYEG  | MSDY    | GDD         | HTGAS<br>GDD |            | QGDV             | LSNG        | NLNK<br>VNS | SSATG        | IKDY     | PEDT       | PAGS        |
| PDBID:1S3P        |       |       |         |             |              |            | GGGTLGV          | DTKG        | NSEYN       | VSGA         | DSSTK    | NDNG       | SLGG        |
| AADS              | GLKKK | DKDK  | SSDA    | DKDG        |              |            | QGDV             | LSNG        | NLNK<br>VNS | SSATG        | IKDY     | PEDT       | PAGS        |
| PDBID:1SKZ        |       |       |         |             |              |            | GGGTLGV          | DTKG        | NSEYN       | VSGA         | DSSTK    | NDNG       | SLGG        |
| PEGS              | IITD  | CPH   | SRYG    | LEP         | PEG          | RLTN       | SEGNPAI          | QGDV        | LSNG        | NLNK<br>VNS  | SSATG    | PEDT       | PAGS        |
| IDI               | CPN   | DKLG  |         |             |              |            | GGGTLGV          | DTKG        | NSEYN       | VSGA         | DSSTK    | NDNG       | SLGG        |
| PDBID:1T1D        |       |       |         |             |              |            | SEGNPAI          | QGDV        | LSNG        | NLNK<br>VNS  | SSAT     | IKDY       | PEDT        |
| SG                | FPDT  | PLRN  | GGR     | PVNV        |              |            | PAGS             | GGGTL<br>GV | DTKG        | NSEYN        | VSGA     | DSSTK      | NDNGD       |
| PDBID:1TGJ        |       |       |         |             |              |            | DLKAKL           | SLGG        |             |              |          |            |             |
| WKW               | PK    | PYLRS | A NPEAS | GR          |              |            | PDBID:2FD2       |             |             |              |          |            |             |
| PDBID:1TS9        |       |       |         |             |              |            | IKCK             | EVCPV<br>D  | PN          | HPDEC        | EDEV     | DGVKG<br>K |             |
| WIG               | SPN   | VG    | TQN     | TEKG        | KRGR         | KG         | PDBID:2FLT       |             |             |              |          |            |             |
| PDBID:1UPJ        |       |       |         |             |              |            | QDRLT            | PAGN        | GG          | VEYG         |          |            |             |
| LWQRP             | GG    | DTGA  | GIGG    | CG          | TPVN         | QIG        | PDBID:2LYO       |             |             |              |          |            |             |
| PDBID:1UVY        |       |       |         |             |              |            | LDN              | NF          | TQA         | NTDG         | GILQ     | SRWW       | DGRTP<br>GS |
| NGI               | GPNA  | ANM   |         |             |              |            | NLCN             | SSD         | DGN         | KGTD         | IRGC     |            |             |
| PDBID:1VIH        |       |       |         |             |              |            | PDBID:2O1N       |             |             |              |          |            |             |
| HK                | GKSG  | SEKS  |         |             |              |            | GCY              | GWG         | NG          | LY           |          |            |             |
| PDBID:2AIF        |       |       |         |             |              |            | PDBID:2OUM       |             |             |              |          |            |             |
| ADAEP             | KDGS  |       |         |             |              | KELA       | LPHG             | DKTG        | ASF         | AHK-<br>PEGA | TF       | TMG        |             |
| PDBID:2AZ9        |       |       |         |             |              |            | PDBID:2P0D       |             |             |              |          |            |             |
| LWKRP             | GG    | DTGA  | GIGG    | CG          | GPT          | QIG        | GG               | GN          | LRGA        | GRHLS        | RRN      | TIPG       | SDH         |
| PDBID:2BHK        |       |       |         |             |              |            | PDBID:2PPN       |             |             |              |          |            |             |
| WDDW              | PL    | EFPL  | DPEST   | DSAN        |              |            | DGRT             | KRG         | EDG         | GKQEVISVG    | ATG      | PGI        |             |
| PDBID:2BHO        |       |       |         |             |              |            | PPH              |             |             |              |          |            |             |
| NEND              | DGH   | HQQ   | LGAD    | FGEHW<br>PA | DG           | LVGL       | PDBID:2QR3       |             |             |              |          |            |             |
| PDBID:2BO1        |       |       |         |             |              |            | NHFS             | MNFTS<br>NE | YRDL        | PW           |          |            |             |
| ARNT              | AGES  |       |         |             |              | PDBID:2UZR |                  |             |             |              |          |            |             |
| PDBID:2EFF        |       |       |         |             |              |            | GKYIK            | NDG         | KER         | VAQ          | ERPRPNWT |            |             |



|           |        |       |        |       |      |      |  |  |            |        |       |       |       |       |       |
|-----------|--------|-------|--------|-------|------|------|--|--|------------|--------|-------|-------|-------|-------|-------|
| HHH       | ATWC   | YPQA  | VDEL   | AMP   | NG   |      |  |  | PSSAS      | DGS    | NIAY  | DGSD  | SGS   | VKGI  | SG    |
| PDBID:3G  |        |       |        |       |      |      |  |  | PDBID:4CQ  |        |       |       |       |       |       |
| M2        |        |       |        |       |      |      |  |  | I          |        |       |       |       |       |       |
| RTDD      | VM     | AVT   |        |       |      |      |  |  | KEGSTV     |        |       |       |       |       |       |
| PDBID:3H  |        |       |        |       |      |      |  |  | PDBID:4DH  |        |       |       |       |       |       |
| 33        |        |       |        |       |      |      |  |  | 0          |        |       |       |       |       |       |
| TRIG      | IDGF   | GKGC  |        |       |      |      |  |  | DGRT       | KRG    | EDG   | GK    | SVG   | ATG   | PGI   |
| PDBID:3H  |        |       |        |       |      |      |  |  | PPH        |        |       |       |       |       |       |
| AF        |        |       |        |       |      |      |  |  |            |        |       |       |       |       |       |
| VGGLG-    |        |       |        |       |      |      |  |  | PDBID:4F69 |        |       |       |       |       |       |
| GY        |        |       |        |       |      |      |  |  |            |        |       |       |       |       |       |
| PDBID:3K  |        |       |        |       |      |      |  |  | FGFKGV     |        |       |       |       |       |       |
| 6D        |        |       |        |       |      |      |  |  | PDBID:4G4  |        |       |       |       |       |       |
| NQ        | VSDRIP | NENSG | DREAIP | DENG  |      |      |  |  | X          |        |       |       |       |       |       |
| PDBID:3K  | GS     |       |        |       |      |      |  |  | DYDS       | NANS   | KEAPV |       |       |       |       |
| QI        |        |       |        |       |      |      |  |  | NP         |        |       |       |       |       |       |
| GSMA      | CVCR   | DVTR  | CDACK  | KKKR  |      |      |  |  | PDBID:4K1  |        |       |       |       |       |       |
| PDBID:3K  |        |       |        |       |      |      |  |  | V          |        |       |       |       |       |       |
| TP        |        |       |        |       |      |      |  |  | DPFGQ      | TGP    | SHNG  | NG    | DEHG  |       |       |
| HPT       | NWPP   | PG    | WKGL   |       |      |      |  |  | PDBID:4LB  |        |       |       |       |       |       |
| PDBID:3M  |        |       |        |       |      |      |  |  | B          |        |       |       |       |       |       |
| CD        |        |       |        |       |      |      |  |  | IPA        | IAGE   | QG    | IPA   | IAGE  | QG    |       |
| ERTL      | LPYM   | ERTL  | LPY    |       |      |      |  |  | PDBID:4MJJ |        |       |       |       |       |       |
| PDBID:3N  |        |       |        |       |      |      |  |  | GL         | TLNP   | GI    | EDE   |       |       |       |
| RW        |        |       |        |       |      |      |  |  |            |        |       |       |       |       |       |
| TDA       | ARE    | DEDL  |        |       |      |      |  |  | PDBID:4UN  |        |       |       |       |       |       |
| PDBID:3T8 |        |       |        |       |      |      |  |  | V          |        |       |       |       |       |       |
| R         |        |       |        |       |      |      |  |  | SLGQ       | TSSDVG | HAGK  | EVN   | PSGVP | GN    | SGL   |
| KEGQ      | RGAKG  | RVP   | IESE   |       |      |      |  |  | GY         |        |       |       | DR    |       |       |
| PDBID:4B9 |        |       |        |       |      |      |  |  | SD         |        |       |       |       |       |       |
| J         |        |       |        |       |      |      |  |  | PDBID:4X1  |        |       |       |       |       |       |
| KEG       | PENV   | VY    | TADDS  | DDKG  | KD   | TPN  |  |  | M          |        |       |       |       |       |       |
| PDBID:4C  |        |       | Q      |       |      |      |  |  | YKDSP      | VP GK  | DRSS  | GG    | LLQEF | SAPT  | TDK   |
| PV        |        |       |        |       |      |      |  |  |            |        |       |       |       |       |       |
| FAGVLN    | AADS   | GLTSK | DQDK   | FKADA | DSDG |      |  |  | GV         |        |       |       |       |       |       |
| PDBID:4E1 |        |       |        |       |      |      |  |  | PDBID:4Y9  |        |       |       |       |       |       |
| P         |        |       |        |       |      |      |  |  | 2          |        |       |       |       |       |       |
| DDFDGSG   | DG     | DDFDG | DG     |       |      |      |  |  | TTTTD      | KKG    | NTEG  | SLTTG |       |       |       |
| PDBID:4F2 |        |       |        |       |      |      |  |  | PDBID:5B1  |        |       |       |       |       |       |
| E         |        |       |        |       |      |      |  |  | F          |        |       |       |       |       |       |
| NG        | MGG    | PE    | KKSV   | PDFG  | PMG  | GMNM |  |  | LDN        | NF     | TQA   | NTDG  | GILQ  | SRW   | DGRTP |
| PDBID:4G  |        |       |        |       |      | M    |  |  |            |        | DGNG  |       |       |       | GS    |
| 3O        |        |       |        |       |      |      |  |  | LCN        | SSD    | MNA   | KGT   | RGC   |       |       |
| FPQV      |        |       |        |       |      |      |  |  |            |        | W     |       |       |       |       |
| PDBID:4G  |        |       |        |       |      |      |  |  | PDBID:5B3  |        |       |       |       |       |       |
| 4W        |        |       |        |       |      |      |  |  | Q          |        |       |       |       |       |       |
| DYDS      | NANS   | KEAPV |        |       |      |      |  |  | DNGLGN     | GFN    | YLTY  | RPER  | WKD   | PEEDP | VTDLW |
|           |        |       |        |       |      |      |  |  | GH         |        |       |       |       |       |       |
|           |        |       |        |       |      |      |  |  | PDBID:5EE  |        |       |       |       |       |       |

|            |  |  |  |  |  |  |            |      |     |    |    |    |     |            |        |       |          |      |        |
|------------|--|--|--|--|--|--|------------|------|-----|----|----|----|-----|------------|--------|-------|----------|------|--------|
| NP         |  |  |  |  |  |  | 2          |      |     |    |    |    |     |            |        |       |          |      |        |
| PDBID:4GBC |  |  |  |  |  |  | NG         | FNSN | SDY | GP | GG | EV | DGD |            |        |       |          |      |        |
| TSI        |  |  |  |  |  |  | LDD        |      |     |    |    |    |     |            |        |       |          |      |        |
| PDBID:4I3I |  |  |  |  |  |  | PDBID:5HBL |      |     |    |    |    |     |            |        |       |          |      |        |
| AFGS       |  |  |  |  |  |  | IPE        |      |     |    |    |    |     | HE         | QAG    | APA   | ED       |      |        |
| PDBID:4NXR |  |  |  |  |  |  | PDBID:5HBQ |      |     |    |    |    |     |            |        |       |          |      |        |
| TAAD       |  |  |  |  |  |  | IPE        |      |     |    |    |    |     | HE         | DQAG   | APA   | ED       |      |        |
| PDBID:4O   |  |  |  |  |  |  | PDBID:5HJC |      |     |    |    |    |     |            |        |       |          |      |        |
| OH         |  |  |  |  |  |  | YKP        |      |     |    |    |    |     | IHKHP      | PPDH   |       |          |      |        |
| DSST       |  |  |  |  |  |  | PDBID:5HPL |      |     |    |    |    |     |            |        |       |          |      |        |
| NLT-KDR    |  |  |  |  |  |  | IPE        |      |     |    |    |    |     | HE         | QAG    | APA   | ED       |      |        |
| VPGK       |  |  |  |  |  |  | GG         |      |     |    |    |    |     | LLQDGEF    | KPT    | TDK   |          |      |        |
| ADG        |  |  |  |  |  |  | GV         |      |     |    |    |    |     | PDBID:5HVZ |        |       |          |      |        |
| YKDSP      |  |  |  |  |  |  | PER        |      |     |    |    |    |     | PER        |        |       |          |      |        |
| PDBID:4ZC3 |  |  |  |  |  |  | PDBID:5KM6 |      |     |    |    |    |     |            |        |       |          |      |        |
| DMN        |  |  |  |  |  |  | KEIP       |      |     |    |    |    |     | DDR        | DISP   | AP    | LNKG     | QSVY | HWPP   |
| PDBID:5AI2 |  |  |  |  |  |  | PDBID:5KUE |      |     |    |    |    |     |            |        |       |          |      |        |
| KICG       |  |  |  |  |  |  | NG         |      |     |    |    |    |     | PS         | KPISD  | DRGI  | SPDG     | ND   |        |
| EDA        |  |  |  |  |  |  | PDBID:5KXF |      |     |    |    |    |     |            |        |       |          |      |        |
| SPGT       |  |  |  |  |  |  | GG         |      |     |    |    |    |     | PEVV       | LN     | LDDG  | QER      |      |        |
| PDDW       |  |  |  |  |  |  | PDBID:5M9A |      |     |    |    |    |     |            |        |       |          |      |        |
| CPICG      |  |  |  |  |  |  | DAKPQGR    |      |     |    |    |    |     | GLTSPCKD   | ENKN   | REN   | GGSPWPPC | NG   |        |
| PDBID:5C68 |  |  |  |  |  |  | PDBID:5YDN |      |     |    |    |    |     |            |        |       |          |      |        |
| PD         |  |  |  |  |  |  | TADG       |      |     |    |    |    |     | ESQP       |        |       |          |      |        |
| PG         |  |  |  |  |  |  | PDBID:6CE8 |      |     |    |    |    |     |            |        |       |          |      |        |
| AEPP       |  |  |  |  |  |  | CPH        |      |     |    |    |    |     | PAAG       | DVTQ   | CGDCG | IQE      | LSCY | GRYING |
| GAGE       |  |  |  |  |  |  | YIDL       |      |     |    |    |    |     | YYCQ       |        |       |          |      |        |
| GPGG       |  |  |  |  |  |  | PDBID:6CEA |      |     |    |    |    |     |            |        |       |          |      |        |
| PDBID:5D54 |  |  |  |  |  |  | PWCPH      |      |     |    |    |    |     | PAAG       | DVTQ   | CGDCG | IQE      | LSCY | GRYING |
| TSI        |  |  |  |  |  |  | YIDL       |      |     |    |    |    |     | YYCQ       |        |       |          |      |        |
| FVNQ       |  |  |  |  |  |  | PDBID:6FGU |      |     |    |    |    |     |            |        |       |          |      |        |
| PDBID:5DZD |  |  |  |  |  |  | SMSV       |      |     |    |    |    |     | HED-AWPFL  | NLKLVP | IKKP  | EDDS     |      |        |
| PEG        |  |  |  |  |  |  | PDBID:6GF  |      |     |    |    |    |     |            |        |       |          |      |        |
| TVDG       |  |  |  |  |  |  |            |      |     |    |    |    |     |            |        |       |          |      |        |
| HNRR       |  |  |  |  |  |  |            |      |     |    |    |    |     |            |        |       |          |      |        |
| PRTG       |  |  |  |  |  |  |            |      |     |    |    |    |     |            |        |       |          |      |        |
| PDBID:5E4X |  |  |  |  |  |  |            |      |     |    |    |    |     |            |        |       |          |      |        |
| GDDGKT     |  |  |  |  |  |  |            |      |     |    |    |    |     |            |        |       |          |      |        |
| MSDA       |  |  |  |  |  |  |            |      |     |    |    |    |     |            |        |       |          |      |        |
| PQDNV      |  |  |  |  |  |  |            |      |     |    |    |    |     |            |        |       |          |      |        |
| PDBID:5H0Y |  |  |  |  |  |  |            |      |     |    |    |    |     |            |        |       |          |      |        |
| SP         |  |  |  |  |  |  |            |      |     |    |    |    |     |            |        |       |          |      |        |
| AVRG       |  |  |  |  |  |  |            |      |     |    |    |    |     |            |        |       |          |      |        |
| AIN        |  |  |  |  |  |  |            |      |     |    |    |    |     |            |        |       |          |      |        |
| AADD       |  |  |  |  |  |  |            |      |     |    |    |    |     |            |        |       |          |      |        |
| SESG       |  |  |  |  |  |  |            |      |     |    |    |    |     |            |        |       |          |      |        |
| TEEEFV     |  |  |  |  |  |  |            |      |     |    |    |    |     |            |        |       |          |      |        |
| PFYE       |  |  |  |  |  |  |            |      |     |    |    |    |     |            |        |       |          |      |        |
| PDBID:5I72 |  |  |  |  |  |  |            |      |     |    |    |    |     |            |        |       |          |      |        |
| PQF        |  |  |  |  |  |  |            |      |     |    |    |    |     |            |        |       |          |      |        |
| KSCW       |  |  |  |  |  |  |            |      |     |    |    |    |     |            |        |       |          |      |        |
| NKG        |  |  |  |  |  |  |            |      |     |    |    |    |     |            |        |       |          |      |        |
| CNNH       |  |  |  |  |  |  |            |      |     |    |    |    |     |            |        |       |          |      |        |
| CPICK      |  |  |  |  |  |  |            |      |     |    |    |    |     |            |        |       |          |      |        |
| PDBID:5JO  |  |  |  |  |  |  |            |      |     |    |    |    |     |            |        |       |          |      |        |

|                |             |       |              |      |      |              |                |                |            |       |      |       |             |  |
|----------------|-------------|-------|--------------|------|------|--------------|----------------|----------------|------------|-------|------|-------|-------------|--|
| E              |             |       |              |      |      |              | 0              |                |            |       |      |       |             |  |
| LKD            | YPEI        | GT    | SDK          | GD   | KN   | GP           | LDN            | NF             | TQA        | NTDG  | GILQ | SRW   | DGRTP<br>GS |  |
| PDBID:5L8<br>Z |             |       |              |      |      |              | LCN            | SSD            | NGMN<br>AW | KGTD  | RGC  |       |             |  |
| TDVL           | AGF         | NPSTG |              |      |      |              | PDBID:6HA<br>4 |                |            |       |      |       |             |  |
| PDBID:5R<br>HN |             |       |              |      |      |              | KSKN           | NDAG           | KDN        | TYNN  |      |       |             |  |
| RPGG           | KEIP        | DDQ   | DISP         | AP   | KKH  | LKKG         | PDBID:7PA<br>Z |                |            |       |      |       |             |  |
| QSVY           | NWPP        |       |              |      |      |              | AE             | PA             | NPG        | VDK   | IKDM | PEGA  | KINE        |  |
| PDBID:5R<br>NT |             |       |              |      |      |              | CTIH           | GDSP           |            |       |      |       |             |  |
| CD             | GS          | GSNS  | NYEGF<br>DF  | LSSG | ENN  | HTGAS<br>GNN | PDBID:1AN<br>U |                |            |       |      |       |             |  |
| PDBID:5U<br>EY |             |       |              |      |      |              | SVG            | GVPSK<br>G     | DPNV       | GDII  | DPN  | NDL   |             |  |
| AKK            | DVEAL<br>G  | IKHP  | PPDH         |      |      |              | PDBID:1A<br>WJ |                |            |       |      |       |             |  |
| PDBID:5U<br>SV |             |       |              |      |      |              | EETL           | DPQE           | DKNG<br>HE | SSYL  |      |       |             |  |
| TSI            | FVNQ        |       |              |      |      |              | PDBID:1B1<br>E |                |            |       |      |       |             |  |
| PDBID:5Y<br>M7 |             |       |              |      |      |              | QDN            | DAKPQ<br>GR    | TSPCQ<br>D | ENKN  | REN  | GGs   | WPPC        |  |
| EDKSPDS        | GK          |       |              |      |      |              | NG             |                |            |       |      |       |             |  |
| PDBID:6B2<br>5 |             |       |              |      |      |              | PDBID:1BE<br>A |                |            |       |      |       |             |  |
| PQENE          | RPG         | NED   | QD           | ANF  | QQNE | VRT          | GPDA           | PG             |            |       |      |       |             |  |
| KEN            | DG          | GK    |              |      |      |              | PDBID:1BM<br>G |                |            |       |      |       |             |  |
| PDBID:6IQ<br>C |             |       |              |      |      |              | RHP            | DG             | PP         | NG    | KS   | KDW   | NSKD        |  |
| KIP            |             |       |              |      |      |              | VTLEQP         |                |            |       |      |       |             |  |
| PDBID:9R<br>AT |             |       |              |      |      |              | PDBID:1CH<br>N |                |            |       |      |       |             |  |
| DSST           | NLT-<br>KDR | CKNG  | YP           | GNPY |      |              | WNMP-<br>NMD   | DGAMS<br>AL    | EA         | KEN   | PF   |       |             |  |
| PDBID:9R<br>NT |             |       |              |      |      |              | PDBID:1CO<br>F |                |            |       |      |       |             |  |
| CD             | GS          | GSNS  | NYEGF<br>DF  | LSSG | ENN  | HTGAS<br>GNN | KKYK           | NDAK           | PEND       | NGNE  | PDTA | LNG   | DFSEVS      |  |
| PDBID:1A<br>E2 |             |       |              |      |      |              | RG             | GA             |            |       |      |       |             |  |
| KPSQA          | SRQG        | NEYP  | DEGQ         | GQFG | DRL  |              |                | PDBID:1D<br>MN |            |       |      |       |             |  |
| PDBID:1A<br>HO |             |       |              |      |      |              | DPFGQ          | SHNG           | NG         | DEHG  |      |       |             |  |
| DDVN           | PY          | PDHV  |              |      |      |              | PDBID:1E6<br>K |                |            |       |      |       |             |  |
| PDBID:1B1<br>U |             |       |              |      |      |              | MPNMD          | DGAMS<br>AL    | EAK        | PF    |      |       |             |  |
| TPSG           | RLLQ        | PG    | LVTEVE<br>CN |      |      |              | PDBID:1FD<br>2 |                |            |       |      |       |             |  |
| PDBID:1B<br>HF |             |       |              |      |      |              | IKCK           | EVAPV<br>D     | PN         | HPDEC | CPAQ | DGVKG |             |  |

|                |       |             |              |            |      |                |                |                  |              |             |              |             |             |
|----------------|-------|-------------|--------------|------------|------|----------------|----------------|------------------|--------------|-------------|--------------|-------------|-------------|
| EPW            | KNL   | APGNT<br>HG | SES-<br>TAGS | DQNNQGLDNG | PR   | PDBID:1FN<br>5 |                |                  |              |             |              |             |             |
| SDGLCTR        |       |             |              |            |      | LDN            | NF             | TQA              | NTDA         | GILQ        | SRWW         | DGRTP<br>GS |             |
| PDBID:1B<br>QR |       |             |              |            |      | NLCN           | SSD            | DGNG<br>MNA<br>W | KGTD         | RGC         |              |             |             |
| KD             | PA    | APG         | TDK          | IKGM       | PDGA | KINE           | PDBID:1HD<br>0 |                  |              |             |              |             |             |
| CTPH           | GDAP  |             |              |            |      |                | SWDT           | PITG             | NG           |             |              |             |             |
| PDBID:1C<br>M3 |       |             |              |            |      |                | PDBID:1HI<br>K |                  |              |             |              |             |             |
| TPNGLD         | NG    | AKS         | TQG          | GED        |      |                | HKCD           | TLCTEL           | DIFAA<br>SKN | DTRCL       | PVK          |             |             |
| PDBID:1E<br>CW |       |             |              |            |      |                | PDBID:1HR<br>Q |                  |              |             |              |             |             |
| SVLS           | LRPGG | TGTA        |              |            |      |                | PAN            | AADD             | QDAT<br>KS   | QF          | ADAAG<br>A   | DE          | QL          |
| PDBID:1EI<br>G |       |             |              |            |      |                | VNG            | CASW             |              |             |              |             |             |
| VSKR           | PENR  | RSTC        | KKG          | DPKQ       | KK   |                | PDBID:1IR9     |                  |              |             |              |             |             |
| PDBID:1F<br>D8 |       |             |              |            |      |                | LDN            | NF               | TQA          | NTDG        | GILQ         | SRWW        | DGRTP<br>GS |
| VM             | CSG   | PD          | LEKQ         |            |      |                | NLCN           | SSD              | DGN          | KGTD        | RGC          |             |             |
| PDBID:1F<br>DB |       |             |              |            |      |                | PDBID:1JER     |                  |              |             |              |             |             |
| IKCK           | CPVD  | PN          | HPDEC        | CPAQ       | EVW  | DGVK<br>K      | VG             | PSSP             | VG           | PANA        | FVNS-<br>DND | VGTH        |             |
| PDBID:1F<br>KK |       |             |              |            |      |                | PDBID:1KC<br>Q |                  |              |             |              |             |             |
| PGDGRT         | KRG   | EDG         | SRDRN        | GKQEVI     | SVG  | ATG            | RRV            | NNGD             | GN           | GSNS        | RSGR         | EGTE        |             |
| PGI            | PPN   |             |              |            |      |                | PDBID:1L7<br>L |                  |              |             |              |             |             |
| PDBID:1F<br>NJ |       |             |              |            |      |                | ANNEAG         | NPGD             | YGP          | REH         | NS           | VNT         | PNNV        |
| RDT            | TPDL  | LSGWQ<br>YV | VTG-<br>GLKK | PQDQI      |      |                | VPGTYGN<br>N   |                  |              |             |              |             |             |
| PDBID:1G<br>DC |       |             |              |            |      |                | PDBID:1LZ<br>4 |                  |              |             |              |             |             |
| CLVCS          | YG    | CAGR        | NLEA         |            |      |                | MDG            | GY               | TRA          | AGDR        | GIFQ         | SRY         | DGKTP<br>GA |
| PDBID:1II<br>Z |       |             |              |            |      |                | AAH            | QDN              | DPQ          | QNR         | VQGC         |             |             |
| AR             | TDK   | NKNG        | GLFQ         | DKYW       | GST  | GKDCN          | PDBID:1M4<br>B |                  |              |             |              |             |             |
| TDD            | KFDAW | NHS         |              |            |      |                | NYKNPK         | KKA              |              |             |              |             |             |
| PDBID:1IK<br>L |       |             |              |            |      |                | PDBID:1M4<br>M |                  |              |             |              |             |             |
| CQCIKT         | HPKF  | GPHCA       | SDG          | DPKE       |      |                | QIW            | FKNW             | CACT         | TENEP<br>DL | FFCF         | EPDD        | SPGC        |
| PDBID:1IR<br>Q |       |             |              |            |      |                | VKK            |                  |              |             |              |             |             |
| PDK            |       |             |              |            |      |                | PDBID:1ML<br>8 |                  |              |             |              |             |             |
| PDBID:1IY<br>U |       |             |              |            |      |                | MQA            | GL               | ASG          | GNSGD<br>KA | QD           | RDL         |             |

|                   |          |          |          |         |       |           |                   |         |           |       |       |        |         |  |
|-------------------|----------|----------|----------|---------|-------|-----------|-------------------|---------|-----------|-------|-------|--------|---------|--|
| KTG<br>PDBID:1J81 | EVEQ     | SAKA     | SPKA     | KLGD    | EG    | PAAGA     | KAV<br>PDBID:1N9N |         |           |       |       |        |         |  |
| NLTKDR            | CKNG     | TGSS     | YP       | GNPY    |       |           | ATLPDC            | GEGT    | RKDG      | TPDG  |       |        |         |  |
| PDBID:1K40        |          |          |          |         |       |           | PDBID:1OOI        |         |           |       |       |        |         |  |
| PAS               |          |          |          |         |       |           | FNF               | NKKG    | ADGQ      |       |       |        |         |  |
| PDBID:1LKL        |          |          |          |         |       |           | PDBID:1P0R        |         |           |       |       |        |         |  |
| EPW               | KNL      | APGNT-HG | SES-TAGS | QNQ     | LDNG  | PR        | RLG               | NTDD    | QTG       | RWNKI | KWYT  | KDHV   | LG DY E |  |
| SDGLCTR           |          |          |          |         |       |           | HDG               |         |           |       |       |        |         |  |
| PDBID:1LRA        |          |          |          |         |       |           | PDBID:1PAZ        |         |           |       |       |        |         |  |
| CD                | GS       | GSNS     | NYEG     | LSSG    | ENN   | HTGAS GNN | AE                | PA      | NPG       | VDK   | IKDM  | PEGA   | KINE    |  |
| PDBID:1N9O        |          |          |          |         |       |           | CTPH              | GDSP    |           |       |       |        |         |  |
| ATLPDC            | GPDEV LG | GEGT     | RKDG     | TPDG    |       |           | PDBID:1PBI        |         |           |       |       |        |         |  |
| PDBID:1NEQ        |          |          |          |         |       |           | CDT               | SNPP    | SNPP      | QCHN  | KNKSA | CDT    | SNPP    |  |
| NEKARD            | LER      | IWPSRY Q |          |         |       |           | SNPP              | QCHN    | KN        |       |       |        |         |  |
| PDBID:1NKO        |          |          |          |         |       |           | PDBID:1QP V       |         |           |       |       |        |         |  |
| EGM               | DSD      | NPAW     | RDR      | RDA     | GN    |           | KKYK              | NDAK    | NGNE      | PD TA | LNGV  | DFSEVS |         |  |
| PDBID:1O4M        |          |          |          |         |       |           | PDBID:1RNZ        |         |           |       |       |        |         |  |
| EEW               | KI       | NAENP RG | SETTKG A | NAK     | LD SG | SR        | DSSTS             | NLT-KDR | CKNG      | TGSS  | YP    | GNPY   |         |  |
| ADGLCH R          |          |          |          |         |       |           | PDBID:1RRY        |         |           |       |       |        |         |  |
| PDBID:1O7Z        |          |          |          |         |       |           | NVIDT             | YNR     | ENP       |       |       |        |         |  |
| CIS               | NPRS     | SQFCP    | KKKGE    | NPES    | CISI  | SQFCP     | PDBID:1RSI        |         |           |       |       |        |         |  |
| KKGE              | NPES     |          |          |         |       |           | NVIDT             | YNR     | ENPPI     |       |       |        |         |  |
| PDBID:1P65        |          |          |          |         |       |           | PDBID:1SFB        |         |           |       |       |        |         |  |
| SDSG              | SDSG     |          |          |         |       |           | LDN               | RG      | NF        | TQA   | NTDG  | YGILQ  | NSRWW C |  |
| PDBID:1PZ4        |          |          |          |         |       |           | DGRTPGS           | NLCN    | LLSSDI TA | VSDG  | CKGT  | WIR    |         |  |
| GIRM              | PA       | GG       | LKNV     | AE      | GALP  |           | PDBID:1U3Z        |         |           |       |       |        |         |  |
| PDBID:1QLS        |          |          |          |         |       |           | DRT               | VTG     | KD        | EENG  | RQF   | YKDVNI | RKSDL   |  |
| RDGNNT            | TE       | DLDS     |          |         |       |           | PDBID:1U42        |         |           |       |       |        |         |  |
| PDBID:1R9H        |          |          |          |         |       |           | DRT               | CVTG    | QKDDI     | EGV   | SPTDV | YKDVNI | KSDL    |  |
| TPKK              | GG       | TTG      | ENG      | GRGNV I | DA    | PPK       | PDBID:1UHD        |         |           |       |       |        |         |  |
| GG                |          |          |          |         |       |           | REG               | VNNG    | KRGE      | AIG   | DEKN  | LN Y   |         |  |
| PDBID:1RBX        |          |          |          |         |       |           | PDBID:1UKU        |         |           |       |       |        |         |  |

|            |         |         |          |        |        |      |            |          |       |        |      |         |          |
|------------|---------|---------|----------|--------|--------|------|------------|----------|-------|--------|------|---------|----------|
| DSST       | NLT-KDR | CKNGQTN | TGSS     | YP     | GNPY   |      | RLIA       | EG       | YDVP  |        |      |         |          |
| PDBID:1SF6 |         |         |          |        |        |      | PDBID:1UPR |          |       |        |      |         |          |
| GRCE-LAAA  | LDN     | RG      | NF       | TQA    | NTDG   | GILQ | DPNL       | DSSGLR   | GH    | DSRE   | LPSY | APRGRRF | PG       |
| SRWWC      | DGRTPGS | NLCN    | KGT      | WIRGC  |        |      | PDBID:1V07 |          |       |        |      |         |          |
| PDBID:1SF7 |         |         |          |        |        |      | VN         | FGFKGV   |       |        |      |         |          |
| LA         | LDN     | RG      | NF       | TQA    | NTDG   | GILQ | PDBID:1V46 |          |       |        |      |         |          |
| SRWW       | DGRTPGS | NLCN    | SSDI-TAS |        |        |      | NAFT       |          |       |        |      |         |          |
| PDBID:1TNS |         |         |          |        |        |      | PDBID:1YV7 |          |       |        |      |         |          |
| LPGLP      | RAGVKG  | GEI     | TSLGYF   |        |        |      | TRDVD      | HCK      | KGI   | TSRPCK | NQ   |         |          |
| PDBID:1U36 |         |         |          |        |        |      | PDBID:2B4A |          |       |        |      |         |          |
| DRT        | VTG     | KD      | RQF      | YKDVNI | RKSDL  |      | CD         | VD       | QTKQ  | SSEH   | KPF  |         |          |
| PDBID:1VER |         |         |          |        |        |      | PDBID:2B9D |          |       |        |      |         |          |
| PR         | ETGE    | DA      | LGS      | GR     | KGSK   | RDL  | CAYCE      | CAYCE    |       |        |      |         |          |
| RLS        |         |         |          |        |        |      | PDBID:2CD5 |          |       |        |      |         |          |
| PDBID:1W6X |         |         |          |        |        |      | LDN        | NF       | TQA   | NTDG   | GILQ | SRW     | DGRTPGS  |
| SKL        | KAG     | KD      | RG       | SKL    | KAG    | KD   | LCN        | SSD      | DGN   | KGTD   | IRGC |         |          |
| RG         |         |         |          |        |        |      | PDBID:2DP9 |          |       |        |      |         |          |
| PDBID:1WRP |         |         |          |        |        |      | GG         | KDE      | RRPGR | LSEV   |      |         |          |
| SPYS       |         |         |          |        |        |      | PDBID:2EG2 |          |       |        |      |         |          |
| PDBID:1XW3 |         |         |          |        |        |      | FDF        | RVGD     | IRTG  |        |      |         |          |
| GAQG       | PDL     |         |          |        |        |      | PDBID:2EQL |          |       |        |      |         |          |
| PDBID:1XW4 |         |         |          |        |        |      | EMDG       | NF       | TRA   | NANG   | GLFQ | NKWW    | KRSS     |
| GAQG       | PDL     |         |          |        |        |      | NACN       | DPK      | KDK   |        |      |         |          |
| PDBID:1YAT |         |         |          |        |        |      | PDBID:2ES9 |          |       |        |      |         |          |
| PGDGAT     | KTG     | ENG     | GV       | SVG    | PRG    | PGL  | IKN        | STY      |       |        |      |         |          |
| PPN        |         |         |          |        |        |      | PDBID:2GSP |          |       |        |      |         |          |
| PDBID:1ZIB |         |         |          |        |        |      | CD         | GS       | GSNS  | NYEG   | LSSG | ENN     | HTGASGNN |
| KD         | PA      | APG     | TDK      | IKGM   | PDGA   | KINE | PDBID:2H8V |          |       |        |      |         |          |
| CTPH       | GDAP    |         |          |        |        |      | VNE        | SL       | DDEA  | LPT    |      |         |          |
| PDBID:1ZPA |         |         |          |        |        |      | PDBID:2INT |          |       |        |      |         |          |
| LWKRP      | GG      | DTGA    | IG       | CG     | GPTPVN |      | TLCTEL     | DIFAASKN | DTRCL |        |      |         |          |

|            |       |          |      |        |      |      |            |         |         |      |         |      |       |
|------------|-------|----------|------|--------|------|------|------------|---------|---------|------|---------|------|-------|
| PDBID:2A3G |       |          |      |        |      |      | PDBID:2KRI |         |         |      |         |      |       |
| ASV        |       |          |      |        |      |      | VKKA       | QG      | KNG     | LHG  | KEKK    | DG   | PKCF  |
| PDBID:2BS5 |       |          |      |        |      |      | SSLAF      | DASDV   | GPA     | CNSS | ACD     | CEDG |       |
| GTVP       | NG    | DGK      | GD   | GS     | GT   | DGNG | PDBID:2OYZ |         |         |      |         |      |       |
| PDBID:2D58 |       |          |      |        |      |      | HG         | QAP     | VGE     | SG   | EGN     |      |       |
| SSD        | NGNG  |          |      |        |      |      | PDBID:2P2E |         |         |      |         |      |       |
| PDBID:2DB7 |       |          |      |        |      |      | DSN        | SLN     | DYKKDYN | NI   | NTNN    | DNS  |       |
| SGGYFD     | DASD  | DASD     |      |        |      |      | PDBID:2RLN |         |         |      |         |      |       |
| PDBID:2DU9 |       |          |      |        |      |      | NLTKDR     | CKNG    | TGSS    | YP   | GNPY    |      |       |
| GTLS       | RGI   |          |      |        |      |      | PDBID:2XCZ |         |         |      |         |      |       |
| PDBID:2FLS |       |          |      |        |      |      | SG         | IGA     | NG      |      |         |      |       |
| NC         | KTSC  | TVP      | NG   |        |      |      | PDBID:3B7X |         |         |      |         |      |       |
| PDBID:2OSN |       |          |      |        |      |      | QRM        | ISGDRG  | APDA    | EHM  | LED     | TLG  | PPL   |
| YIN        | GCYC  | QP       | RTAD | MISASN |      | SC   | PPN        |         |         |      |         |      |       |
| PDBID:2P8V |       |          |      |        |      |      | PDBID:3CR5 |         |         |      |         |      |       |
| AR         | DPATK | ATRN     | GA   | TPNM   | SQK  |      | EGDKH      | SHFL    | DSDG    |      |         |      |       |
| PDBID:2PAL |       |          |      |        |      |      | PDBID:3ETW |         |         |      |         |      |       |
| SFAG       | AADS  | DQDK     | SPSA | DKDG   |      |      | NTRFY      |         |         |      |         |      |       |
| PDBID:2QIU |       |          |      |        |      |      | PDBID:3F8C |         |         |      |         |      |       |
| FVN        | TSI   | NY       | GERG |        |      |      | NGEME      | DEGR    |         |      |         |      |       |
| PDBID:2R39 |       |          |      |        |      |      | PDBID:3FRV |         |         |      |         |      |       |
| DP         | DRNQ  | FRVAGE   | LNDV | EPG    | SA   |      | PPK        | GQ      |         |      |         |      |       |
| PDBID:2WQH |       |          |      |        |      |      | PDBID:3H9W |         |         |      |         |      |       |
| YPNN       | YPNN  |          |      |        |      |      | WQT        | HRDG    | DDSG    |      |         |      |       |
| PDBID:2XBD |       |          |      |        |      |      | PDBID:3HQA |         |         |      |         |      |       |
| WSD        | SSAW  | NGSQ     | NA   | SGST   | PNGS | KNGS | KH         | NNDE    | NNDE    |      |         |      |       |
| PDBID:3C97 |       |          |      |        |      |      | PDBID:3IRC |         |         |      |         |      |       |
| TN         | FD    | DIQMPPMD | IDDD | GAEL   | KPL  |      | TQHG       | DAP     | EKG     | TANP | KE      | GEKA |       |
| PDBID:3CR2 |       |          |      |        |      |      | PDBID:3L6W |         |         |      |         |      |       |
| EGDKH      | SHFL  | DSDG     |      |        |      |      | PEKGDEK    | DWTQ    | IRSIN   | GTDS | GAKE    | TDDH | KYDHT |
| PDBID:3FWU |       |          |      |        |      |      | DASVL      | RPNNAVF | LPPK    | KRGT | SVDEAVT | PPFS | LGKM  |
| PEDLV      | DST   | FG       | LGG  | PLHC   | NG   |      | PEKGDEK    | DWTQ    | IRSIN   | KSDD | GAKE    | TDDH | KYDHT |

|            |      |        |             |       |      |        |  |            |             |                  |      |             |      |             |
|------------|------|--------|-------------|-------|------|--------|--|------------|-------------|------------------|------|-------------|------|-------------|
| PDBID:3K0X |      |        |             |       |      |        |  | DASVL      | RPNNA<br>VF | LPPK             | KRGT | SVDEA<br>VT | PPFS | LGKM        |
| KDG        | NG   | GS     | VTVVLPDV    | QKH   | DG   | AVGI   |  | PDBID:3LHC |             |                  |      |             |      |             |
| PDBID:3K63 |      |        |             |       |      |        |  | GS         | RTNG        | LNSVI            | DG   | GSS         | TAAG | DG          |
| RLKDT      | AA   | PNQ    | YQNE        | YPDG  | KKNN | NPYG   |  | PDBID:3NZ3 |             |                  |      |             |      |             |
| DENG       | PG   |        |             |       |      |        |  | KVTN       | KVTG        | IDK              | DIP  | SDS         |      |             |
| PDBID:3K9I |      |        |             |       |      |        |  | PDBID:3QD7 |             |                  |      |             |      |             |
| AS         | FPNH | DKLDE  |             |       |      |        |  | TGFL       | PLSQ        | REGL             | LLRQ | DDKS        | FDD  |             |
| PDBID:3KHQ |      |        |             |       |      |        |  | PDBID:3RSD |             |                  |      |             |      |             |
| CSQ        | PR   | KRSS   | RGSQ        | GS    | QNI  | KCD    |  | DSST       | NLT-KDR     | CKNG             | TGSS | YP          | GNPY |             |
| PDBID:3KU7 |      |        |             |       |      |        |  | PDBID:3T8T |             |                  |      |             |      |             |
| AATA       | RTL  | RTL    | LPYME<br>E  |       |      |        |  | KEGQ       | RGAKG       | RVP              | IESE |             |      |             |
| PDBID:3Q1D |      |        |             |       |      |        |  | PDBID:3VXW |             |                  |      |             |      |             |
| CEEHEEE    | LSCE | GAHKDC |             |       |      |        |  | FKN        | AEKS        | IDKR             | ADL  | PPEKA       | ND   | PTAA        |
| PDBID:3R3K |      |        |             |       |      |        |  | DKDG       |             |                  |      |             |      |             |
| QG         |      |        |             |       |      |        |  | PDBID:4BS7 |             |                  |      |             |      |             |
| PDBID:3T3J |      |        |             |       |      |        |  | LDN        | NF          | TQA              | NTDG | GILQ        | SRWW | DGRTP<br>GS |
| KPYTFEDY   | SG   | GDL    | PSS         | TGK   | SHDG | LSSLAY |  | NLCN       | SSD         | DGNG<br>MNA<br>W | KGTD | RGC         |      |             |
| PDBID:4DP2 |      |        |             |       |      |        |  | PDBID:4E1R |             |                  |      |             |      |             |
| GAD-DGSLA  | PS   | PAG    | SEED        | AKG   | CSPH | GM     |  | DDFDG      | DG          | DDFDG            | DG   |             |      |             |
| PDBID:4DP4 |      |        |             |       |      |        |  | PDBID:4EES |             |                  |      |             |      |             |
| ADDG       | PS   | PAG    | SEED        | AKG   | CSPH | GM     |  | DPRLPDN    | ILG         | GPET             | TKSG | DQKG        |      |             |
| PDBID:4EC2 |      |        |             |       |      |        |  | PDBID:4ETD |             |                  |      |             |      |             |
| SHG        | PAF  | PPNKQ  | PLS         | LNGE  | LRNG |        |  | LDN        | NF          | TQA              | NTDG | GILQ        | SRW  | DGRTP<br>GS |
| PDBID:4GBN |      |        |             |       |      |        |  | LCN        | SSD         | DGNG<br>MNA<br>W | KGTD | RGC         |      |             |
| TSI        |      |        |             |       |      |        |  | PDBID:4HE7 |             |                  |      |             |      |             |
| PDBID:4IDL |      |        |             |       |      |        |  | ENY        | LAN         | DEKR             | YCE  |             |      |             |
| QTGG       | APGK | TTG    | GDFVK<br>GR | NANN  | DSL  | DGAR   |  | PDBID:4HV2 |             |                  |      |             |      |             |
| PDBID:4JJD |      |        |             |       |      |        |  | LDN        | NF          | TQA              | NTDG | GILQ        | SRW  | DGRTP<br>GS |
| DPN        | LYD  | ATLS   | TKG         | NHNGE | KN   |        |  | LCN        | SSD         | KGT              | RGC  |             |      |             |
| PDBID:4JZ3 |      |        |             |       |      |        |  | PDBID:4IC9 |             |                  |      |             |      |             |

|           |       |      |       |       |      |      |            |       |       |      |       |      |       |
|-----------|-------|------|-------|-------|------|------|------------|-------|-------|------|-------|------|-------|
| TETD      | KKG   | NTEG | SLTTG |       |      |      | VGVGGS     | EPGD  | GLLN  | GLDT |       |      |       |
| PDBID:4K  |       |      |       |       |      |      |            |       |       |      |       |      |       |
| V4        |       |      |       |       |      |      |            |       |       |      |       |      |       |
| DVEAL-    | IKHP  | PPDH |       |       |      |      | DEKQQH     | CSND  | FGVQ  | VKE  |       |      |       |
| GLH       |       |      |       |       |      |      |            |       |       |      |       |      |       |
| PDBID:4M  |       |      |       |       |      |      | PDBID:4MZ  |       |       |      |       |      |       |
| DQ        |       |      |       |       |      |      | 2          |       |       |      |       |      |       |
| DEKQQH    | CSND  | VKE  |       |       |      |      | VNGT       | SAFGF | SSDA  | EKS  | DDR   | SMNN | RDL   |
| PDBID:4Q  |       |      |       |       |      |      | PDBID:4N5  |       |       |      |       |      |       |
| YW        |       |      |       |       |      |      | T          |       |       |      |       |      |       |
| PD        | MPEMN | DPNA | MG    | PF    |      |      | GEGT       | EEV   | DKQR  | QH   | CHDD  | VK   | WAQSA |
| PDBID:4X  |       |      |       |       |      |      |            |       |       |      |       |      |       |
| O2        |       |      |       |       |      |      | PDBID:4P15 |       |       |      |       |      |       |
| MT        | MT    |      |       |       |      |      | GEG        | HSY   |       |      |       |      |       |
| PDBID:5C  |       |      |       |       |      |      | PDBID:4P7  |       |       |      |       |      |       |
| 4P        |       |      |       |       |      |      | U          |       |       |      |       |      |       |
| PD        | PG    | AEPP | GAGE  | NQD   | GPGG |      | CEKPQE     | DEN   | DPKL  | HD   | LE-   | PG   | SDE   |
| PDBID:5D  |       |      |       |       |      |      | PDBID:4P9  |       |       |      | DAAS  |      |       |
| KN        |       |      |       |       |      |      | E          |       |       |      |       |      |       |
| EGDKH     | SHFL  | DSDG | FFE   |       |      |      | CKRM       | NG    | PSGF  | NPFV | IDGS  |      |       |
| PDBID:5E  |       |      |       |       |      |      | PDBID:4PE  |       |       |      |       |      |       |
| H4        |       |      |       |       |      |      | 7          |       |       |      |       |      |       |
| EPE       |       |      |       |       |      |      | EGDKH      | SHFL  | DSDG  |      |       |      |       |
| PDBID:5H  |       |      |       |       |      |      | PDBID:4RL  |       |       |      |       |      |       |
| DG        |       |      |       |       |      |      | N          |       |       |      |       |      |       |
| DAL       | SPSG  | FD   | PC    | RG    |      |      | LDN        | NF    | TQA   | NTDG | GILQ  | SRW  | DGRTP |
| PDBID:5N  |       |      |       |       |      |      |            |       |       |      |       |      | GS    |
| WX        |       |      |       |       |      |      | LCN        | SSD   | DGNG  | MNA  | KGTD  | RG   | GC    |
|           |       |      |       |       |      |      |            |       | W     |      |       |      | CR    |
| TTG       | RTG   | GR   | LNDG  | YP    |      |      | PDBID:4RU  |       |       |      |       |      |       |
|           |       |      |       |       |      |      | D          |       |       |      |       |      |       |
| PDBID:5O  |       |      |       |       |      |      | SSRTE      | PEGE  | HG    | SKC  | GAYN  | TDLC | SRTE  |
| C8        |       |      |       |       |      |      |            |       |       |      |       |      |       |
| EK        | CSND  | VKE  |       |       |      |      | PEGE       | HG    | SKC   | GAYN | TD    | DL   | LC    |
| PDBID:5U  |       |      |       |       |      |      |            |       |       |      |       |      |       |
| EV        |       |      |       |       |      |      | CN         | NK    |       |      |       |      |       |
| DVEALGL   | IKHP  | PPDH |       |       |      |      | PDBID:4W   |       |       |      |       |      |       |
|           |       |      |       |       |      |      | O6         |       |       |      |       |      |       |
| PDBID:5U  |       |      |       |       |      |      | LDN        | NF    | TQA   | NTDG | GILQ  | SRW  | DGRTP |
| VY        |       |      |       |       |      |      |            |       |       |      |       |      | GS    |
| DVEAL-    | IKHP  | PPDH |       |       |      |      | LCN        | SSD   | DGNG  | MNA  | KGT   | RGC  |       |
| GLH       |       |      |       |       |      |      |            |       | W     |      |       |      |       |
| PDBID:6E  |       |      |       |       |      |      | PDBID:5CP  |       |       |      |       |      |       |
| VL        |       |      |       |       |      |      | V          |       |       |      |       |      |       |
| DPSH      |       |      |       |       |      |      | FAGVLN     | AADS  | GLTSK | DQDK | FKADA | DSDG |       |
| PDBID:6P  |       |      |       |       |      |      | PDBID:5E0  |       |       |      |       |      |       |
| AZ        |       |      |       |       |      |      | Z          |       |       |      |       |      |       |
| AE        | PA    | NPG  | VDK   | IKDM  | PEGA | KINE | VAG        | PAG   | PPAG  | VDS  | LSG   | HN   | PPAG  |
| CTIH      | GDSP  |      |       |       |      |      | RDG        |       |       |      |       |      |       |
| PDBID:1B0 |       |      |       |       |      |      | PDBID:5E4  |       |       |      |       |      |       |
| T         |       |      |       |       |      |      | P          |       |       |      |       |      |       |
| IKCK      | CPVD  | PN   | HPDEC | DGVKG |      |      | LD         | RG    | NF    | TQA  | NTDG  | GILQ | SRWWC |

|            |        |          |         |        |          |           |            |           |        |        |       |      |         |      |          |        |     |      |     |
|------------|--------|----------|---------|--------|----------|-----------|------------|-----------|--------|--------|-------|------|---------|------|----------|--------|-----|------|-----|
| K          |        |          |         |        |          |           |            |           |        |        |       |      |         |      |          |        |     |      |     |
| PDBID:1BFE |        |          |         |        |          |           | DGRTPGS    | NLCN      | SSD    | NGMNAW | CKGTD | IRGC |         |      |          |        |     |      |     |
| RGST       | GEDGE  | LAGG     | RKG     | NG     | LRNA     | GQ        | PDBID:5EN9 |           |        |        |       |      |         |      |          |        |     |      |     |
| EAN        | NSSG   |          |         |        |          |           | TSI        |           |        |        |       |      |         |      |          |        |     |      |     |
| PDBID:1C0B |        |          |         |        |          |           | PDBID:5G25 |           |        |        |       |      |         |      |          |        |     |      |     |
| KET        | DSST   | NLT-KDRC | CKNGQTN | KYPN   | GNPY     |           | GG         | AQDG      | CPTAGD | EE     |       |      |         |      |          |        |     |      |     |
| PDBID:1C76 |        |          |         |        |          |           | PDBID:5UEP |           |        |        |       |      |         |      |          |        |     |      |     |
| DGKG       | KPG    | TAYKE    | DPSA    | KNKK   | TEKG     | LSE-HIKNP | DVEALGL    | IKHP      | PPDH   |        |       |      |         |      |          |        |     |      |     |
| PDBID:1CUO |        |          |         |        |          |           | PDBID:5UVZ |           |        |        |       |      |         |      |          |        |     |      |     |
| STR        | PASCA  | PKTGMG   | GGG     | SKDE   | YPGHFSMM |           | DVEAL-GLH  | IKHP      | PPDH   |        |       |      |         |      |          |        |     |      |     |
| PDBID:1DDV |        |          |         |        |          |           | PDBID:5VR3 |           |        |        |       |      |         |      |          |        |     |      |     |
| DPNTK      | STRN   | GS       | TPNM    | SQK    |          |           | PAIP       | EHNP      |        |        |       |      |         |      |          |        |     |      |     |
| PDBID:1E5B |        |          |         |        |          |           | PDBID:5XWE |           |        |        |       |      |         |      |          |        |     |      |     |
| WSD        | SSA    | NGSQ     | SGST    | NGSGN  | KNGS     |           | IDSC       | PEGE      | YT     | PKTE   | YT    | IDSC | PEGE    |      |          |        |     |      |     |
| PDBID:1EFQ |        |          |         |        |          |           | WKI        |           |        |        |       |      |         | PKTE |          |        |     |      |     |
| PD         | SLG    | SQS      | SSNS    | KPGQ   | WAS      | ESGVDP    | PDBID:6FGT |           |        |        |       |      |         |      |          |        |     |      |     |
| GT         | SS     | YYSTPY   |         |        |          |           | SMSV       | HED-AWPFL | NLKLVP | IKKP   | EDDS  |      |         |      |          |        |     |      |     |
| PDBID:1EN2 |        |          |         |        |          |           | PDBID:6H0L |           |        |        |       |      |         |      |          |        |     |      |     |
| SQGG       | IWG    | CGRT     | RSDH    | GN     | GQD      | VHG       | LDN        | NF        | TQA    | NTDG   | GILQ  | SRW  | DGRTPGS |      |          |        |     |      |     |
| PDBID:1EOT |        |          |         |        |          |           | LCN        |           |        |        |       |      |         | SSD  | DGNGMNAW | KGTD   | RGC |      |     |
| PASVP      | CFNL   | PLQR     | SGKCPQK | KLA    | DPKK     |           | PDBID:1A18 |           |        |        |       |      |         |      |          |        |     |      |     |
| PDBID:1FAO |        |          |         |        |          |           | CDAFV      |           |        |        |       |      |         | GD   | STFK     | TADD   | GG  | DG   | GD  |
| LG         | GGLVK  | RN       | KDQMSPE | YSQERV | PF       |           | KG         |           |        |        |       |      |         |      |          |        |     |      |     |
| PDBID:1FAZ |        |          |         |        |          |           | PDBID:1B6E |           |        |        |       |      |         |      |          |        |     |      |     |
| DLCTQA     | NPFGFP |          |         |        |          |           | QEK        |           |        |        |       |      |         | RC   | WENG     | SQYLFP | NTK | NPNG | CED |
| PDBID:1FDA |        |          |         |        |          |           | PDBID:1C9V |           |        |        |       |      |         |      |          |        |     |      |     |
| IKCK       | CPVD   | PN       | HPDEC   | CPAQ   | PEDM     | LPD       | DSST       | NLT-KDR   | CKNG   | TGSS   | YP    | GNPY |         |      |          |        |     |      |     |
| WDGVKGK    |        |          |         |        |          |           | PDBID:1CS3 |           |        |        |       |      |         |      |          |        |     |      |     |
| PDBID:1FE3 |        |          |         |        |          |           | GTLC       |           |        |        |       |      |         | DSQ  | SQ       | DFL    |     |      |     |
| VEAFC      | GD     | STFK     | LG      | TADD   | DGDK     | DG        | PDBID:1DCF |           |        |        |       |      |         |      |          |        |     |      |     |

|            |         |       |       |        |       |         |  |            |         |      |         |         |      |         |
|------------|---------|-------|-------|--------|-------|---------|--|------------|---------|------|---------|---------|------|---------|
| GD         |         |       |       |        |       |         |  | FTGL       | SHEHK   | VEN  | KPV     |         |      |         |
| PDBID:1FER |         |       |       |        |       |         |  | PDBID:1EMN |         |      |         |         |      |         |
| IKCK       | CPVD    | PN    | HPDEC | EDEVPE | DGVKG |         |  | DG         | PFG     | GN   | NPCGN   | IG      | TCEE | GF      |
| PDBID:1FEV |         |       |       |        |       |         |  | PDBID:1EOQ |         |      |         |         |      |         |
| NLTKDR     | CKNG    | TGSS  | YP    | GNPY   |       |         |  | GPSE       | STL     |      |         |         |      |         |
| PDBID:1FOW |         |       |       |        |       |         |  | PDBID:1EOW |         |      |         |         |      |         |
| MTFITKT    | IESG    | RSMG  |       |        |       |         |  | DSST       | NLT-KDR | CKNG | TGSS    | YP      | GNPY |         |
| PDBID:1GD6 |         |       |       |        |       |         |  | PDBID:1EQV |         |      |         |         |      |         |
| SR         | TSK     | NRNG  | GLFQ  | DRYW   | KDCN  | TDD     |  | GD         | KG      | LL   | ETK     | PKK     | AKK  | DKYG    |
| RFD        | AW      | HCQGS |       |        |       |         |  | DG         | AP      |      |         |         |      |         |
| PDBID:1GHJ |         |       |       |        |       |         |  | PDBID:1FIK |         |      |         |         |      |         |
| PESIA      | WHKKPGE | KRD   | DKV   | NEGD   | LSG   |         |  | YKDSP      | VP GK   | GG   | LLQDGEF | TGGA    | TDK  | GV      |
| PDBID:1GKH |         |       |       |        |       |         |  | PDBID:1FKD |         |      |         |         |      |         |
| AQ         | SRQG    | NEYP  | DEGQ  | GQFG   | DRL   |         |  | DGRT       | KRG     | EDG  | GK      | SVG     | ATG  | PGI     |
| PDBID:1GV2 |         |       |       |        |       |         |  | PPH        |         |      |         |         |      |         |
| GPKR       | LKGR    | GNR   | LPGR  |        |       |         |  | PDBID:1FKF |         |      |         |         |      |         |
| PDBID:1GXT |         |       |       |        |       |         |  | DGRT       | KRG     | EDG  | GK      | SVG     | ATG  | PGI     |
| VQGV       | DGDG    | PPLA  | SQL   |        |       |         |  | PPH        |         |      |         |         |      |         |
| PDBID:1H2P |         |       |       |        |       |         |  | PDBID:1HEY |         |      |         |         |      |         |
| RN         | VP GG   | FG    | NTG   | ST     | ISGSS | IDN     |  | DKEL       | TGKS    | NN   | WNMPNMD | DGAMSAL | KPF  |         |
| QGERDH     | YR      | NKGF  | EH    | NNDE   |       |         |  | PDBID:1HME |         |      |         |         |      |         |
| PDBID:1IDI |         |       |       |        |       |         |  | DPNA       | HPGL    |      |         |         |      |         |
| TAT        | NLCY    | CDAF  | SRGK  | KPYE   | TDKC  |         |  | PDBID:1IOS |         |      |         |         |      |         |
| PDBID:1J7Z |         |       |       |        |       |         |  | LDN        | NF      | TQA  | NTDG    | GILQ    | SRWW | DGRTPGS |
| NLTKDR     | CKNG    | TGSS  | YP    | GNPY   |       |         |  | NLCN       | SSD     | DGN  | KGTD    | RGC     |      |         |
| PDBID:1JPO |         |       |       |        |       |         |  | PDBID:1JPE |         |      |         |         |      |         |
| LDN        | NF      | TQA   | NTDG  | GILQ   | SRWW  | DGRTPGS |  | QH         | EFY     | DAG  |         |         |      |         |
| NLCN       | SSD     | KGTD  | RGC   |        |       |         |  | PDBID:1KM9 |         |      |         |         |      |         |
| PDBID:1KM8 |         |       |       |        |       |         |  | DN         | GG      | TGVI | PRPC    | NQ      | GR   |         |
| DN         | GG      | TGV   | PRPC  | NQ     | GR    |         |  | PDBID:1KXX |         |      |         |         |      |         |
| PDBID:1KSM |         |       |       |        |       |         |  | LNN        | NF      | TQA  | NTDG    | GILQ    | SRWW | DGRTPGS |
| KEGDPN     | DKNG    |       |       |        |       |         |  | NLCN       | SSD     | DGN  | KGTD    | RGC     |      |         |

|            |      |         |         |      |        |         |            |         |            |         |      |      |         |  |
|------------|------|---------|---------|------|--------|---------|------------|---------|------------|---------|------|------|---------|--|
| QL         |      |         |         |      |        |         | PDBID:1LXI |         |            |         |      |      |         |  |
| PDBID:1KTH |      |         |         |      |        |         | WQDW       | AFPL    | NPETV DDSS |         |      |      |         |  |
| PNTK       | NENK |         |         |      |        |         | PDBID:1M   |         |            |         |      |      |         |  |
| PDBID:1LOZ |      |         |         |      |        |         | G6         |         |            |         |      |      |         |  |
| MDG        | GY   | TRA     | AGDR    | GTFQ | SRYW   | DGKTPGA | GCNC       | NK      | HL         |         |      |      |         |  |
| NACH       | QDN  | DPQ     | QNR     | VQGC |        |         | PDBID:1O2E |         |            |         |      |      |         |  |
| PDBID:1MH7 |      |         |         |      |        |         | IPSS       | NN      | GCY        | NPYTN   | NN   | SSEN | NLDMKN  |  |
| VPAR       | GCY  | GG      | QG      | KGRN | NI     |         | PDBID:1O45 |         |            |         |      |      |         |  |
| PDBID:1O4K |      |         |         |      |        |         | EEW        | KI      | NAENPRG    | SETTKG  | NAK  | LDSG | SR      |  |
| EEW        | KI   | NAENPRG | SETTKGA | NAK  | LDSG   | SR      | ADGLCHR    |         |            |         |      |      |         |  |
| ADGLCHR    |      |         |         |      |        |         | PDBID:1O4G |         |            |         |      |      |         |  |
| PDBID:1O4L |      |         |         |      |        |         | SIQAEW     | KI      | NAENPRG    | SETTKGA | NAK  | LDSG | SR      |  |
| EEW        | KI   | NAENPRG | SETTKG  | NAK  | LDSG   | SR      | ADGLCHR    |         |            |         |      |      |         |  |
| ADGLCHR    |      |         |         |      |        |         | PDBID:1Q8B |         |            |         |      |      |         |  |
| PDBID:1O4Q |      |         |         |      |        |         | DLNEI      | EEG     |            |         |      |      |         |  |
| EEW        | KI   | NAENPRG | SETTKG  | NAK  | LDSG   | SR      | PDBID:1R26 |         |            |         |      |      |         |  |
| ADGLCHR    |      |         |         |      |        |         | MRAR       | AVWC    | FPTV       | ADNN    | QLP  | SG   | GAN     |  |
| PDBID:1RTU |      |         |         |      |        |         | PDBID:1RLK |         |            |         |      |      |         |  |
| PQ         | GG   | YP      | SEDI    | VYNG | RD     | TNTG    | KDLD       | GYTQVE  |            |         |      |      |         |  |
| HTGA       | SYDG |         |         |      |        |         | PDBID:1SDZ |         |            |         |      |      |         |  |
| PDBID:1RZY |      |         |         |      |        |         | FTDW       | LDWL    | GD         | FFCG    | EQED | PIN  |         |  |
| KEIPA      | DDQ  | DISP    | AP      | KKH  | LKKG   | QSVY    | PDBID:1SNQ |         |            |         |      |      |         |  |
| NWPP       |      |         |         |      |        |         | GD         | KG      | LL         | ETVEKY  | AKK  | DKYG | DG      |  |
| PDBID:1TUW |      |         |         |      |        |         | KG         |         |            |         |      |      |         |  |
| HD         | RSH  | AQDW    |         |      |        |         | PDBID:1SSC |         |            |         |      |      |         |  |
| PDBID:1U3J |      |         |         |      |        |         | DSST       | NLT-KDR | CKNG       | TGSS    | YP   |      |         |  |
| DRT        | VTG  | KD      | EV      | RQF  | YKDVNI | KSDL    | PDBID:1TAY |         |            |         |      |      |         |  |
| PDBID:1UIC |      |         |         |      |        |         | MDG        | GY      | TRA        | AGDR    | GIFQ | SRAW | DGKTPGA |  |
| LDN        | NF   | TQA     | NTDG    | GILQ | SRWW   | DGRTPGS | NACH       | QDN     | DPQ        | QNR     | VQGC |      |         |  |
| NLCN       | SSD  | DGN     | KGT     | RGC  |        |         | PDBID:1TXA |         |            |         |      |      |         |  |

|                |       |      |               |      |            |      |  |                |            |                  |               |             |             |             |  |  |  |
|----------------|-------|------|---------------|------|------------|------|--|----------------|------------|------------------|---------------|-------------|-------------|-------------|--|--|--|
| PDBID:1V<br>HF |       |      |               |      |            |      |  | PDAT           | KPGV       | DNC              | TWKRK         |             |             |             |  |  |  |
| RLIA           | KG    | YETP | LTEY          |      |            |      |  | PDBID:1U6<br>8 |            |                  |               |             |             |             |  |  |  |
| PDBID:1ZI<br>A |       |      |               |      |            |      |  | YNR            | ENP        |                  |               |             |             |             |  |  |  |
| KD             | PA    | APG  | PTDK          | IKGM | PDGA       | KINE |  | PDBID:1U9<br>R |            |                  |               |             |             |             |  |  |  |
| CTPH           | GDAP  |      |               |      |            |      |  | GD             | KG         | LL               | ETVEKY        | AKK         | DKYG        | DG          |  |  |  |
| PDBID:1ZJ<br>7 |       |      |               |      |            |      |  | KG             |            |                  |               |             |             |             |  |  |  |
| LWQRP          | GG    | DTGA | IG            | CG   |            |      |  | PDBID:1UI<br>D |            |                  |               |             |             |             |  |  |  |
| PDBID:2B8<br>G |       |      |               |      |            |      |  | LDN            | NF         | TQA              | NTDG          | GILQ        | SRWW        | DGRTP<br>GS |  |  |  |
| KAG            | EKG   | MK   | DRS           | KEG  | NEG        | SNST |  | NLCN           | SSD        | DGNG<br>MNA<br>W | KGTD          | RGC         |             |             |  |  |  |
| PDBID:2B<br>RF |       |      |               |      |            |      |  | PDBID:1YE<br>B |            |                  |               |             |             |             |  |  |  |
| PPGE           | PSDGQ | PLTQ | DRK-<br>CSRTQ | PETR | GQ         | KPG  |  | QQCH           | EEGG       | NKVG<br>P        | LHG           | SGQVK<br>GY | TN          | IPGT        |  |  |  |
| VG             | NG    |      |               |      |            |      |  | PDBID:208L     |            |                  |               |             |             |             |  |  |  |
| PDBID:2B<br>ZY |       |      |               |      |            |      |  | MDG            | GY         | TRA              | AGDR          | GIFQ        | SRYW        | DGKTP<br>GA |  |  |  |
| DKT            | EVG   | NING | NG            | DKT  | EVG        | NING |  | NAAH           | QDN        | DPQ              | QNR           | QGC         |             |             |  |  |  |
| NG             | PQ    | QN   |               |      |            |      |  | PDBID:2D4<br>M |            |                  |               |             |             |             |  |  |  |
| PDBID:2C<br>W4 |       |      |               |      |            |      |  | ATPGS          | PPN        | DNDY             | VNN           | SQG         |             |             |  |  |  |
| TDRAP          | AQ    | GG   | IP            | APDG | DE         | TPPY |  | PDBID:2FO<br>3 |            |                  |               |             |             |             |  |  |  |
| PDBID:2H<br>B4 |       |      |               |      |            |      |  | PIN            | HPNNI<br>R | LEN-<br>TIYAN    | PDDY-<br>PLKP | QKP         | TH          | YSNG        |  |  |  |
| LWKRP          | GG    | DTGA | IG            | CG   | GPTPV<br>N |      |  | GDDYNPS<br>L   |            |                  |               |             |             |             |  |  |  |
| PDBID:2J5<br>A |       |      |               |      |            |      |  | PDBID:2FT<br>B |            |                  |               |             |             |             |  |  |  |
| KPTL           | QK    | DED  |               |      |            |      |  | NGD            | PN         | IG               | SMGG          | GG          | TDQ         | GN          |  |  |  |
| PDBID:2JK<br>7 |       |      |               |      |            |      |  | GG             |            |                  |               |             |             |             |  |  |  |
| PRN            | FGTW  | GD   | FHCG          | KPSE | YPGC       |      |  | PDBID:2H8<br>A |            |                  |               |             |             |             |  |  |  |
| PDBID:2N<br>UH |       |      |               |      |            |      |  | NKV            | NDL        | VPF              | SLSG          | QPNR        |             |             |  |  |  |
| RL             | WQGK  | YRLP |               |      |            |      |  | PDBID:2JP8     |            |                  |               |             |             |             |  |  |  |
| PDBID:2O<br>PY |       |      |               |      |            |      |  | RVYI           |            |                  |               |             |             |             |  |  |  |
| PRN            | GTW   | GD   | FHCG          | KPSE | PGC        |      |  | PDBID:2MS<br>S |            |                  |               |             |             |             |  |  |  |
| PDBID:2P<br>PI |       |      |               |      |            |      |  | SVNT           | VD         | DKTT<br>NRHR     | FES           | NN          | KA          |             |  |  |  |
| DG             | EGI   |      |               |      |            |      |  | PDBID:2OQ<br>K |            |                  |               |             |             |             |  |  |  |
| PDBID:2V<br>6H |       |      |               |      |            |      |  | EEG            | NG         | FDG              | NPG           | DF          | GEIPET<br>T |             |  |  |  |

|             |           |      |       |        |      |      |            |        |       |         |       |         |     |
|-------------|-----------|------|-------|--------|------|------|------------|--------|-------|---------|-------|---------|-----|
| TVGG        | GKW       | QH   | RASK  | TDA    | TKDK |      | PDBID:2OUB |        |       |         |       |         |     |
| PDBID:3A0V  |           |      |       |        |      |      | SS         | GCY    | GWG   | NG      | LY    |         |     |
| KDG         | VLG       | LPD  | KGER  | NAKTQ  |      |      | PDBID:2P61 |        |       |         |       |         |     |
| PDBID:3BI9  |           |      |       |        |      |      | SPT        | KL     | EWQTI |         |       |         |     |
| LGQ         | PNSKCNALV | DGTR | STK   | KVQFG  | SNT  | GWFN | PDBID:2PNE |        |       |         |       |         |     |
| AL          |           |      |       |        |      |      | CPG        | GPG    | NPGC  | GT      | GTPK  |         |     |
| PDBID:3E NU |           |      |       |        |      |      | PDBID:2PVT |        |       |         |       |         |     |
| KNF         | PRL       | PFG  | WENK  | GPR    | HNY  | DAGA | GCY        | GG     | NG    | LY      |       |         |     |
| ANL         | FDNF      |      |       |        |      |      | PDBID:2QDB |        |       |         |       |         |     |
| PDBID:3EZM  |           |      |       |        |      |      | GN         | KGQ    | LL    | AKK     | DKYG  | DG      | KG  |
| GS          | RTNG      | LNSV | DG    | NFIET  | GSS  | TRAQ | PDBID:2QHW |        |       |         |       |         |     |
| DG          |           |      |       |        |      |      | GCY        | WG     | NG    | LY      |       |         |     |
| PDBID:3FAJ  |           |      |       |        |      |      | PDBID:2REA |        |       |         |       |         |     |
| KKGD        |           |      |       |        |      |      | DGR        | YNPD   | EGQ   | RMVLGRT |       |         |     |
| PDBID:3GLW  |           |      |       |        |      |      | PDBID:2REY |        |       |         |       |         |     |
| RNF         | TR        | GQ   |       |        |      |      | MEYN       | MKGG   | EPG   | ND      | FENM  |         |     |
| PDBID:3GM3  |           |      |       |        |      |      | PDBID:2UUX |        |       |         |       |         |     |
| RTDD        | AQL       | AVT  |       |        |      |      | PIGW       | MGNC   |       |         |       |         |     |
| PDBID:3GQU  |           |      |       |        |      |      | PDBID:2VSL |        |       |         |       |         |     |
| PSS         | LGAHG     | PWW  | IAE   |        |      |      | PRN        | FGTW   | GD    | FHCG    | KPSE  | PGC     |     |
| PDBID:3IZ   |           |      |       |        |      |      | PDBID:2W51 |        |       |         |       |         |     |
| TSI         | FVNQ      |      |       |        |      |      | RPGDC      | TFS    | TDDA  | DSQICEL | KKL   | GETCKGC |     |
| PDBID:3I7W  |           |      |       |        |      |      | PDBID:3BKS |        |       |         |       |         |     |
| DSSTS       | NLT-KDR   | KP   | CKNG  | TGSS   | YP   | GNPY | DRSKR      | EG     | FNDL  | ELAV    | TADYP | KETS    |     |
| PDBID:3I7X  |           |      |       |        |      |      | PDBID:3CQ1 |        |       |         |       |         |     |
| DSSTS       | NLT-KDR   | KP   | CKNG  | TGSS   | YP   | GNPY | DPELG      | VVNLG  | PP    | PLHD    | LPGV  | FEPP    | RLI |
| PDBID:3IE9  |           |      |       |        |      |      | PDBID:3DML |        |       |         |       |         |     |
| ADGA        | KM        | ETP  | KVG   | VAGVLG | KKE  | TP   | QPGC       | QRD    | PPGL  | LARP    | FTP   | GD      |     |
| PDBID:3INC  |           |      |       |        |      |      | PDBID:3G7C |        |       |         |       |         |     |
| TSI         |           |      |       |        |      |      | WIREYP     | REES   |       |         |       |         |     |
| PDBID:3J4G  |           |      |       |        |      |      | PDBID:3KLU |        |       |         |       |         |     |
| LDNYRGYNF   |           | TQA  | NTDGS | GILQ   | SRWW | TPGS | LSFFPGQT   | PISKRF | DKEG  | TTEL    | PTFKA |         |     |
| NLCN        | SSD       | KGT  | IRGC  |        |      |      | PDBID:3L1  |        |       |         |       |         |     |

M

GK

PDBID:3LL  
H

EPN           GD           GQP   GD       PS

PDBID:3O7  
0

LYFQGL   FAGR   NECH   KS       VPEV

PDBID:3P2  
X

CTS

PDBID:3PA  
Z

AE           PA           NPG   VDK       IKDM   PEGA   KINE

CTPH       GDSP

PDBID:3RN  
T

CD           GS           GSNS   NYEGF  
DF       LSSG   ENN       HTGAS  
GNN

PDBID:3UB  
2

SRWSKD   GAI           QALS   APGAE   SGL       GRG

PDBID:3UB  
3

SRWSKD   SEE           GAI   QALS   PGAEG   SGL       GRG

PDBID:3U  
MD

EHVAFGS   GDG       VIG   DSPEF   DYQM   SGD

PDBID:3U  
ME

AFGS       GDG       VIG   DYQM   SGD

PDBID:3V1  
G

TSI           GRG       TSI   GRG

PDBID:3W  
UN

LDN           NF           TQA   NTDG   GILQ   SRW       DGRTP  
GS

LCN           SSD           DGNG  
MNA   KGT       IRGC  
W

PDBID:4AY  
A

VPSIPQNK   HLKPSF   VPSIP  
QNK

PDBID:4CG  
Q

QPQN       AEHV   RMEE

PDBID:4DH  
4

PDBID:3JZ  
R

KDT       DEKQQ  
H       CSND   VKE

PDBID:3K  
VT

GG       KIPAT   TEGML  
N       PVLN   PTDVC

PDBID:3O  
NH

PQD       ASNQ   YD       EDLND  
R       GNG   EEGDT   DELPC  
NT

PDBID:3S9  
K

NLETYEW   SI       KEG       SRTPGT   KAIISE  
N       DSPK   FDS

GGGLVTR   SPGI

PDBID:3U  
AF

CPTD       KK       DRNG   GP       HRDSN   PS       LDR

PDBID:3W  
VT

PQCKEE   GT       SPG       GELT   APR       LSKC   ST

DQG       GD

PDBID:4D  
P0

ADDGSLA   PS       PAG       SEED   AKG       CSPH   GM

PDBID:4F6  
8

FGFKGV

PDBID:4FE  
6

LWQRP   GG       DTGA   IG       CG       PTPVN

PDBID:4G  
QV

KPTT       DEDW   EKT       DSDG

PDBID:4K  
59

EGE       KADY   GN       PRG

PDBID:4K  
GT

GG       DG       GGL   DG

PDBID:4LF  
Q

RKTCCG

PDBID:4L  
TT

KPF       PD       DD

|                |               |             |       |       |      |        |                |                |                  |       |      |      |              |  |
|----------------|---------------|-------------|-------|-------|------|--------|----------------|----------------|------------------|-------|------|------|--------------|--|
| PDBID:4N<br>EJ |               |             |       |       |      |        | VAA            | GG             | GG               | GD    |      |      |              |  |
| KKA            |               |             |       |       |      |        | PDBID:4ET<br>A |                |                  |       |      |      |              |  |
| PDBID:4O<br>XW |               |             |       |       |      |        | LDN            | NF             | TQA              | NTDG  | GILQ | SRW  | DGRTP<br>GS  |  |
| EGKSK          | GG            | PELV        | IYSAL |       |      |        | LCN            | SSD            | DGNG<br>MNA<br>W | KGTD  | RGC  |      |              |  |
| PDBID:4T<br>QN |               |             |       |       |      |        | PDBID:4ET<br>B |                |                  |       |      |      |              |  |
| VKNP           | YQE           | RKTS        |       |       |      |        | LDN            | NF             | TQA              | NTDG  | GILQ | SRW  | DGRTP<br>GS  |  |
| PDBID:5B7<br>9 |               |             |       |       |      |        | LCN            | SSD            | DGNG<br>MNA<br>W | KGT   | RGC  |      |              |  |
| CDFCL          | SKINKK<br>TG  | CSDCG       | KTYRW | CIECK | NICG | SEN    | PDBID:4ET<br>E |                |                  |       |      |      |              |  |
| CDDCD          | LTPSMS<br>EP  | ASIY        |       |       |      |        | LDN            | NF             | TQA              | NTDG  | GILQ | SRW  | DGRTP<br>GS  |  |
| PDBID:5B<br>PO |               |             |       |       |      |        | LCN            | SSD            | DGNG<br>MNA<br>W | KGTD  | RGC  |      |              |  |
| TSI            | TSI           |             |       |       |      |        | PDBID:4EW<br>W |                |                  |       |      |      |              |  |
| PDBID:5P<br>AL |               |             |       |       |      |        | TSI            |                |                  |       |      |      |              |  |
| DPGT           | LKGK          | DKDQ        | SAHG  | DSDH  |      |        |                | PDBID:4EW<br>Z |                  |       |      |      |              |  |
| PDBID:5U<br>VS |               |             |       |       |      |        | TSI            |                |                  |       |      |      |              |  |
| DVEALGL        | IKHP          | PPDH        |       |       |      |        | PDBID:4F6<br>D |                |                  |       |      |      |              |  |
| PDBID:6B<br>BK |               |             |       |       |      |        | VN             | FGFKGV         |                  |       |      |      |              |  |
| SATPKDT        | STL           | NQDG        | KNDG  |       |      |        | PDBID:4GS<br>P |                |                  |       |      |      |              |  |
| PDBID:6C<br>EC |               |             |       |       |      |        | CD             | GS             | GSNS             | NYEG  | LSSG | ENN  | HTGAS<br>GNN |  |
| CPH            | PAAG          | DVTQ        | CGDCG | IQE   | LSCY | GRYING | PDBID:4HB<br>6 |                |                  |       |      |      |              |  |
| YIDL           | YYCQ          |             |       |       |      |        | KAKNG          | VPD            | GKGC             |       |      |      |              |  |
| PDBID:6C<br>EF |               |             |       |       |      |        | PDBID:4JH<br>B |                |                  |       |      |      |              |  |
| PWCPH          | PAAG          | DVTQ        | CGDCG | IQE   | LSCY | GRYING | GS             | NKE            | CTG              | KE    | TASW | RQF  | YEDLEI       |  |
| YIDL           | YYCQ          |             |       |       |      |        | RLTDG          |                |                  |       |      |      |              |  |
| PDBID:6E<br>VM |               |             |       |       |      |        | PDBID:4LJ<br>N |                |                  |       |      |      |              |  |
| DPSH           |               |             |       |       |      |        | SFCL           | KEQNR<br>EK    | CADC<br>G        | CIECK | SSCR | ADN  | CDSCD        |  |
| PDBID:6F<br>H6 |               |             |       |       |      |        | CDPP           | PKGM           | KK               | KG    |      |      |              |  |
| SMSV           | HED-<br>AWPFL | NLKL<br>VPG | IKKP  | EDDS  |      |        |                | PDBID:4P2<br>P |                  |       |      |      |              |  |
| PDBID:6IF<br>H |               |             |       |       |      |        | IPGS           | NN             | GCY              | LDSC  | NT   | NSKN | NLDTK<br>KY  |  |
| MKIPGM         |               |             |       |       |      |        | TPDV           |                |                  |       |      |      |              |  |
| AYGE           |               |             |       |       |      |        | KPF            |                |                  |       |      |      |              |  |
|                |               |             |       |       |      |        | PDBID:4RL      |                |                  |       |      |      |              |  |

|                |                |       |                  |       |            |       |                |      |                  |       |      |      |             |  |
|----------------|----------------|-------|------------------|-------|------------|-------|----------------|------|------------------|-------|------|------|-------------|--|
| D              |                |       |                  |       |            |       | M              |      |                  |       |      |      |             |  |
| PDBID:1A<br>B0 |                |       |                  |       |            |       | LDN            | NF   | TQA              | NTDG  | GILQ | SRW  | DGRTP<br>GS |  |
| GDAFV          | GD             | STHK  | TADD             | GG    | DG         | GD    | LCN            | SSD  | DGNG<br>MNA<br>W | KGT   | RG   | GC   | CR          |  |
| KG             |                |       |                  |       |            |       | PDBID:4YM<br>8 |      |                  |       |      |      |             |  |
| PDBID:1A<br>CD |                |       |                  |       |            |       | LDN            | NF   | TQA              | NTDG  | GILQ | SRW  | DGRTP<br>GS |  |
| GDAFV          | GD             | STHK  | TADD             | GG    | DG         | GD    | LCN            | SSD  | NGMN<br>AW       | KGT   | RGC  |      |             |  |
| KG             |                |       |                  |       |            |       | PDBID:4YO<br>P |      |                  |       |      |      |             |  |
| PDBID:1B1<br>J |                |       |                  |       |            |       | LDN            | NF   | TQA              | NTDG  | GILQ | SRW  | DGRTP<br>GS |  |
| QDNS           | DAKPQ<br>GR    | TSPC  | ENKN             | REN   | WPPC       | ENGL  | LCN            | SSD  | DGNG<br>MNA<br>W | KGTD  | RGC  |      |             |  |
| QSIFRR         |                |       |                  |       |            |       | PDBID:5CO<br>9 |      |                  |       |      |      |             |  |
| PDBID:1B<br>M2 |                |       |                  |       |            |       | TSI            |      |                  |       |      |      |             |  |
| HPW            | KI             | HDG   | SESA-<br>PGD     | GN    | DGAG       | LWV   | PDBID:5D<br>M9 |      |                  |       |      |      |             |  |
| RNQ            |                |       |                  |       |            |       | LDN            | NF   | TQA              | NTDG  | GILQ | SRW  | DGRTP<br>GS |  |
| PDBID:1B<br>QK |                |       |                  |       |            |       | LCN            | SSD  | NGMN<br>AW       | KGTD  | IRGC |      |             |  |
| KD             | PA             | APG   | PTDK             | IKGM  | PDGA       | KINE  | PDBID:5HB<br>P |      |                  |       |      |      |             |  |
| CTPH           | GDAP           |       |                  |       |            |       | IPE            | HE   | APA              | ED    |      |      |             |  |
| PDBID:1D<br>1M |                |       |                  |       |            |       | PDBID:5H<br>MB |      |                  |       |      |      |             |  |
| NADG           | DG             | NADG  | DG               |       |            |       | PD             | PHG  | GDR              | GAT   | DAAG |      |             |  |
| PDBID:1D<br>DW |                |       |                  |       |            |       | PDBID:5HQ<br>I |      |                  |       |      |      |             |  |
| DPNTK          | STRN           | GS    | SQK              | SRAN  |            |       | TSI            | FVNQ |                  |       |      |      |             |  |
| PDBID:1E6<br>L |                |       |                  |       |            |       | PDBID:5LA<br>W |      |                  |       |      |      |             |  |
| DKEL           | WNMP<br>NMD    | SAL   | AEA              | KPF   |            |       | EKQQH          | CSND | VKE              |       |      |      |             |  |
| PDBID:1F<br>DD |                |       |                  |       |            |       | PDBID:5LN<br>2 |      |                  |       |      |      |             |  |
| IKCK           | EVC<br>PV<br>D | PN    | HPDEC            | PEDM  | DGVKG<br>K |       | SQIP           | SVG  | DEKQ<br>QH       | CSND  | VKE  |      |             |  |
| PDBID:1FE<br>5 |                |       |                  |       |            |       | PDBID:6CE<br>6 |      |                  |       |      |      |             |  |
| GCY            | EP             | DTAD  | MIS<br>SST<br>NC |       |            |       | CPH            | PAAG | DVTQ             | CGDCG | IQE  | LSCY | GRYING      |  |
| PDBID:1FF<br>2 |                |       |                  |       |            |       | YIDL           | YYCQ |                  |       |      |      |             |  |
| IKCK           | PN             | HPDEC | PEDM             | DGVKG |            |       | PDBID:6DX<br>H |      |                  |       |      |      |             |  |
| PDBID:1FL<br>Q |                |       |                  |       |            |       | SKHAFSL        | CSKC | REN              | LTDG  | YFDG | PD   | YDED        |  |
| LDN            | NF             | TQA   | NTDG             | GILQ  | SRWW       | DGRTP | DMLKM          |      |                  |       |      |      |             |  |

|                |        |              |             |             |       |             |  |                |              |              |             |       |       |             |
|----------------|--------|--------------|-------------|-------------|-------|-------------|--|----------------|--------------|--------------|-------------|-------|-------|-------------|
| GS             |        |              |             |             |       |             |  |                |              |              |             |       |       |             |
| NLCN           | SSD    | DGNG<br>MNAW | KATD        | RGC         |       |             |  | PDBID:6IN<br>S |              |              |             |       |       |             |
| PDBID:1FL<br>Y |        |              |             |             |       |             |  | GERG           | TP           | PKG          | TSI         |       |       |             |
| LDN            | NF     | TQA          | NTDG        | GILQ        | SRWW  | DGRTP<br>GS |  | PDBID:6JQ4     |              |              |             |       |       |             |
| NLCN           | SSD    | DAN          | KGTD        | RGC         |       |             |  | DPEN           | GKRK         |              |             |       |       |             |
| PDBID:1G<br>OD |        |              |             |             |       |             |  | PDBID:1A0<br>B |              |              |             |       |       |             |
| KDKT           |        |              |             |             |       |             |  | SPDL           |              |              |             |       |       |             |
| PDBID:1H<br>EH |        |              |             |             |       |             |  | PDBID:1AF<br>5 |              |              |             |       |       |             |
| VRG            | WAD    | SGSSW        | NGGQ        | PNGS        | KNGS  |             |  | NKE            | PNQSY<br>KFK | TQR          | GS          | LKLKQ | AALN  |             |
| PDBID:1H<br>RC |        |              |             |             |       |             |  | PDBID:1AL<br>B |              |              |             |       |       |             |
| AQCH           | EKGG   | HKTGP        | LHGLF<br>G  | TGQAP<br>GF | IPGT  |             |  | CDAFV          | GD           | STFK         | LG          | TADD  | GG    | DG          |
| PDBID:1J7<br>3 |        |              |             |             |       |             |  | GD             | KG           |              |             |       |       |             |
| GERG           |        |              |             |             |       |             |  | PDBID:1B1I     |              |              |             |       |       |             |
| PDBID:1JZ<br>A |        |              |             |             |       |             |  | DAKPQGR        | TSPCKD       | ENKN         | REN         | WPPC  | NG    |             |
| KSTG           | AKNQG  | YAF          | GLPEST      | PN          | KSTG  | AKNQG       |  | PDBID:1BA<br>S |              |              |             |       |       |             |
| YAF            | GLPEST | PN           |             |             |       |             |  | KNGG           | HPDG         | EKS-<br>DPHI | RG          | VSAN  | KEDG  | TDEC        |
| PDBID:1K<br>1Z |        |              |             |             |       |             |  | ESNN           | RKYTS<br>W   | KRTG         | GPGQK<br>AI |       |       |             |
| AQDKKR         | ELGL   | GIPP         | PGAF        | NPG         | AEAEH | TATN        |  | PDBID:1CY<br>I |              |              |             |       |       |             |
| PCNR           |        |              |             |             |       |             |  | AACH           | NSVMP<br>EKT | LDGG         | GA          | WADRL |       |             |
| PDBID:1M<br>1S |        |              |             |             |       |             |  | PDBID:1DK<br>J |              |              |             |       |       |             |
| PP             | PATG   | SNNEH        | PV          | DAKG        | PAEE  | AP-<br>FKAG |  | LDN            | NF           | SQA          | NTDG        | GVLQ  | SRWW  | DGKTP<br>GS |
| PDBID:1O<br>41 |        |              |             |             |       |             |  | NLCN           | SSD          | KGT          | RGC         |       |       |             |
| EEW            | KI     | NAENP<br>RG  | SETTKG<br>A | NAK         | LDSG  | SR          |  | PDBID:1EV<br>3 |              |              |             |       |       |             |
| ADGLCH<br>R    |        |              |             |             |       |             |  | TSI            | TSI          |              |             |       |       |             |
| PDBID:1O<br>47 |        |              |             |             |       |             |  | PDBID:1HE<br>7 |              |              |             |       |       |             |
| EEW            | KI     | NAENP<br>RG  | SETTKG<br>A | NAK         | LDSG  | SR          |  | GQPA           | NG           | TSF          | AANE        | QP    | PF    | NPFE        |
| ADGLCH<br>R    |        |              |             |             |       |             |  | PDBID:1HQ<br>8 |              |              |             |       |       |             |
| PDBID:1O<br>4R |        |              |             |             |       |             |  | PNNW           | RN           | IYS          | IPANG       | EDG   | SYNQL | IPKG        |
| SIQAEW         | KI     | NAENP<br>RG  | SETTKG<br>A | NAK         | LDSG  | SR          |  | SSF            | DCAN         |              |             |       |       |             |
| ADGLCH<br>R    |        |              |             |             |       |             |  | PDBID:1I0V     |              |              |             |       |       |             |
| PDBID:1O       |        |              |             |             |       |             |  | CD             | GS           | GSNS         | NYEG        | LSSG  | ENN   | HTGAS       |

|            |       |           |       |       |      |         |            |         |         |       |          |       |         |         |  |  |
|------------|-------|-----------|-------|-------|------|---------|------------|---------|---------|-------|----------|-------|---------|---------|--|--|
| R5         |       |           |       |       |      |         | GNN        |         |         |       |          |       |         |         |  |  |
| SALT       | EDDSV | RYG       |       |       |      |         | PDBID:1I3Z |         |         |       |          |       |         |         |  |  |
| PDBID:1PAL |       |           |       |       |      |         | LPY        | GCL     | VDG     | ESVPG | KK       | EKHGY |         | DAHT    |  |  |
| SFAG       | AADS  | DQDK      | FSPSA | DKDG  |      |         |            | PN      |         |       |          |       |         |         |  |  |
| PDBID:1Q4R |       |           |       |       |      |         | PDBID:1IO  |         |         |       |          |       |         |         |  |  |
| KDGV       | HQGY  |           |       |       |      |         |            | LDN     | NF      | TQA   | NTDG     | GIFQ  | SRWW    | DGRTPGS |  |  |
| PDBID:1QL2 |       |           |       |       |      |         | NLCN       | SSD     | DGN     | KGTD  | RGC      |       |         |         |  |  |
| IDT        | IDT   | IDT       |       |       |      |         | PDBID:1IR  |         |         |       |          |       |         |         |  |  |
| PDBID:1T00 |       |           |       |       |      |         | EKGG       | HKVGP   | LHGIFG  | SGQAE | IPGT     |       |         |         |  |  |
| HMAG       | TDD   | LKN       | AAWC  | GDKI  | IDEN | SIP     | PDBID:1JDL |         |         |       |          |       |         |         |  |  |
| GG         |       |           |       |       |      |         | CMACH      | GPDA    | NLVGPL  | TGVID | AG-TAPGF | PD    |         |         |  |  |
| PDBID:1UIA |       |           |       |       |      |         | PDBID:1JK  |         |         |       |          |       |         |         |  |  |
| DN         | NF    | TQA       | NTDG  | GILQ  | SRWW | DGRTPGS | MDG        | GY      | TRA     | AGDR  | GIFQ     | SRYW  | DGKTPGA |         |  |  |
| NLCN       | SSD   | GN        | KGT   | RGC   |      |         |            | NACH    | QDN     | DPQ   | QNR      | VQGC  |         |         |  |  |
| PDBID:1UWM |       |           |       |       |      |         | PDBID:1KH  |         |         |       |          |       |         |         |  |  |
| EHNG       | KPG   | AYEP-NPAT | DG    |       |      |         | FANG       | NG      | FANG    | NG    |          |       |         |         |  |  |
| PDBID:1W   |       |           |       |       |      |         | PDBID:1KH  |         |         |       |          |       |         |         |  |  |
| WDDW       | PL    | EFPL      | DPEST | DSAN  |      |         |            | DSSTS   | NLT-KDR | CKNG  | TGSS     | YP    |         |         |  |  |
| PDBID:1WHI |       |           |       |       |      |         | PDBID:1KXI |         |         |       |          |       |         |         |  |  |
| QE         | GSGR  | NIG       | TKRG  | RPDG  | RDDK | AP      | LPFI       | PEGK    | KKFPL   | DNC   | SAL      | TDKC  | LPFI    |         |  |  |
| PDBID:1WY9 |       |           |       |       |      |         | PEGK       | KKF     | DNC     | SAL   | TDKC     |       |         |         |  |  |
| SND        | NGNG  | SEE       |       |       |      |         | PDBID:1L5  |         |         |       |          |       |         |         |  |  |
| PDBID:1YGT |       |           |       |       |      |         | LDVR       | GPGGK   | GPS     | DE    | GT       | NYLP  | GSG     |         |  |  |
| GGN        | KP    | NNDTD     | NKT   |       |      |         | AAAG       | SPDG    | DP      | PA    | AC       | CD    | DP      |         |  |  |
| PDBID:1Z21 |       |           |       |       |      |         | PE         | EA      | FS      | AF    |          |       |         |         |  |  |
| SNPP       |       |           |       |       |      |         | PDBID:1LVE |         |         |       |          |       |         |         |  |  |
| PDBID:2A9I |       |           |       |       |      |         | PD         | SLG     | SQS     | SSNS  | KPGQ     | WAS   | ESGV    | PD      |  |  |
| TPST       | PQE   | KPSG      | RYN   | LQTGL |      |         |            | GT      | SS      | QAEDV | STPY     |       |         |         |  |  |
| PDBID:2AZ8 |       |           |       |       |      |         | PDBID:1MB  |         |         |       |          |       |         |         |  |  |
| LWKRP      | GG    | DTGA      | LPG   | IG    | CG   | GPT     | LPEI       | DDDLAHI | KPI     |       |          |       |         |         |  |  |
| PDBID:2BQQ |       |           |       |       |      |         | PDBID:1NE  |         |         |       |          |       |         |         |  |  |

|           |        |        |         |      |      |      |            |      |      |          |         |        |         |
|-----------|--------|--------|---------|------|------|------|------------|------|------|----------|---------|--------|---------|
| NG        | RYF    | SSDRFR | NI      | LPQG | IDG  | EEGE | PAN        | AADD | QD   | QF       | QLF-PGK | VNG    | CASW    |
| DDV       | NPNW   |        |         |      |      |      | PDBID:1O3X |      |      |          |         |        |         |
| PDBID:2C  |        |        |         |      |      |      | NKLI       | SQG  | TEDN |          |         |        |         |
| OQ        |        |        |         |      |      |      |            |      |      |          |         |        |         |
| PR        | ETGE   | DTA    | LGS     | GR   | RDL  | AFN  | PDBID:1O5J |      |      |          |         |        |         |
| PDBID:2E  |        |        |         |      |      |      | KG         | YETP | LTEY |          |         |        |         |
| H9        |        |        |         |      |      |      |            |      |      |          |         |        |         |
| ELG       | GK     | GEEP   |         |      |      |      | PDBID:1PZC |      |      |          |         |        |         |
| PDBID:2H  |        |        |         |      |      |      | AE         | PA   | NPG  | VDK      | IKDM    | PEGA   | KINE    |
| WV        |        |        |         |      |      |      |            |      |      |          |         |        |         |
| GD        | AY     | RG     | IG      | FGD  | ED   | PS   | CTPH       | GDSP |      |          |         |        |         |
| PTY       | RGV    |        |         |      |      |      | PDBID:1REX |      |      |          |         |        |         |
| PDBID:2JI |        |        |         |      |      |      |            |      |      |          |         |        |         |
| N         |        |        |         |      |      |      | MDG        | GY   | TRA  | AGDR     | GIFQ    | SRYW   | DGKTPGA |
| DYLV      | PS     | LG     | KENG    | QEG  | NG   | LKNL | NACH       | QDN  | DPQ  | QNR      | VQGC    |        |         |
| GY        |        |        |         |      |      |      | PDBID:1RFP |      |      |          |         |        |         |
| PDBID:2O  |        |        |         |      |      |      | LDN        | NF   | TQA  | NTDG     | GILQ    | SRWW   | DGRTPGS |
| 0P        |        |        |         |      |      |      |            |      |      |          |         |        |         |
| RGQAN     | AEPGED | DADG   |         |      |      |      | NLCN       | SSD  | DGN  | KGTD     | RGC     |        |         |
| PDBID:2O  |        |        |         |      |      |      | PDBID:1RS2 |      |      |          |         |        |         |
| 0Q        |        |        |         |      |      |      |            |      |      |          |         |        |         |
| RGQAN     | GED    | DADG   |         |      |      |      | NVIDT      | YNR  | ENP  |          |         |        |         |
| PDBID:2O  |        |        |         |      |      |      | PDBID:1SNP |      |      |          |         |        |         |
| AI        |        |        |         |      |      |      |            |      |      |          |         |        |         |
| REDG      | DGTL   | NNYH   | LAG     | HVG  | AG   | GA   | GD         | KG   | LL   | ETVEKY   | AKK     | DKYG   | DG      |
| PDBID:2OJ |        |        |         |      |      |      | KG         |      |      |          |         |        |         |
| R         |        |        |         |      |      |      |            |      |      |          |         |        |         |
| DTNN      | EGDE   | DTNN   | EGDELLA | TLTG | EPSD | AG   | PDBID:1T2J |      |      |          |         |        |         |
| EDGR      | LSDYN  | QKES   | LR      | RG   |      |      | QPGG       | APGK | SGSG | AD-SVKGR | NSL     | DWYGMD |         |
| PDBID:2O  |        |        |         |      |      |      | PDBID:1TCY |      |      |          |         |        |         |
| N8        |        |        |         |      |      |      |            |      |      |          |         |        |         |
| GKTL      |        |        |         |      |      |      | MDG        | GY   | TRA  | AGDR     | GIFQ    | SRFW   | DGKTPGA |
| PDBID:2P1 |        |        |         |      |      |      |            |      |      |          |         |        |         |
| X         |        |        |         |      |      |      | NACH       | QDN  | DPQ  | QNR      | VQGC    |        |         |
| GG        | ENG    | KQG    | GD      | DRSG |      |      | PDBID:1TVQ |      |      |          |         |        |         |
| PDBID:2Q  |        |        |         |      |      |      |            |      |      |          |         |        |         |
| 1M        |        |        |         |      |      |      | GD         | PR   | LG   | TMDG     | NG      | EK     | GN      |
| GPLPSK    | SEPP   | DW     | NANY    | NK   | NKSK | HVG  | GG         |      |      |          |         |        |         |
| NSEHQ     |        |        |         |      |      |      | PDBID:1UW3 |      |      |          |         |        |         |
| PDBID:2X4 |        |        |         |      |      |      | LGGY       | FGN  |      |          |         |        |         |
| 4         |        |        |         |      |      |      |            |      |      |          |         |        |         |
| PAVV      | SSRG   | AT     | DS      | MMGN | LDDS | SGN  | PDBID:1VED |      |      |          |         |        |         |
| PDBID:2Y  |        |        |         |      |      |      |            |      |      |          |         |        |         |
| HN        |        |        |         |      |      |      | LDN        | NF   | TQA  | NTDG     | GILQ    | SRWW   | DGRTPGS |

|            |            |              |             |            |     |              |            |         |             |             |           |            |            |  |
|------------|------------|--------------|-------------|------------|-----|--------------|------------|---------|-------------|-------------|-----------|------------|------------|--|
| CMVCC      | EE         | PCG          | CPVCR       | CMVCC      | PCG | CPVCR        | NLCN       | SSD     | NGMN<br>AW  | KGT         | IRGC      |            |            |  |
| PDBID:2Z44 |            |              |             |            |     |              | PDBID:1Z3L |         |             |             |           |            |            |  |
| PIQE       | LPE        |              |             |            |     |              | TAAA       | NLT-KDR | CKNG        | TGSS        | YP        | GNPY       |            |  |
| PDBID:2ZHH |            |              |             |            |     |              | PDBID:2A9Q |         |             |             |           |            |            |  |
| NSGNQ      | SRSDC      |              |             |            |     |              | PD         | KPF     |             |             |           |            |            |  |
| PDBID:3A7L |            |              |             |            |     |              | PDBID:2APB |         |             |             |           |            |            |  |
| PAEL       | SKEH       | EADG         | EVG         | SAG        | VKA | PVS          | AA         | PR      | VTG         | DTGH        | AG        | GDIPD<br>G | QE         |  |
| DSP        | EPYAG<br>G | SD           |             |            |     |              | ES         | GGGT    |             |             |           |            |            |  |
| PDBID:3BOV |            |              |             |            |     |              | PDBID:2B29 |         |             |             |           |            |            |  |
| APKE       | VG         | ELE          | SLQSER<br>A | PS         | GA  |              | SEG        | DTNI    | GN          | DGL         | EQLSSN    | LKDG       | SAEAV<br>G |  |
| PDBID:3BY5 |            |              |             |            |     |              | PDBID:2FKE |         |             |             |           |            |            |  |
| RKGA       | KADE       | TFS-QASL     | GAGA        | GD         |     |              | DGRT       | EDG     | GK          | SVG         | ATG       | PGI        | PPH        |  |
| PDBID:3DP5 |            |              |             |            |     |              | PDBID:2FKL |         |             |             |           |            |            |  |
| ASWS       | AV         | NTVHP<br>EKT | RNPGP<br>GM | GEAMI<br>P |     |              | DKC        | RMDV    | ID          | PDKC        | RMDV      | ID         |            |  |
| PDBID:3EAZ |            |              |             |            |     |              | PDBID:2FMB |         |             |             |           |            |            |  |
| MPW        | KI         | YPPETG       | TNYPG       | DG         | AS  | IDEEV        | LEKR       | ND      | DTGA<br>DTS | LKYR        | VG        | KG         | DI         |  |
| ADGLCTR    |            |              |             |            |     |              | PDBID:2I9V |         |             |             |           |            |            |  |
| PDBID:3ERS |            |              |             |            |     |              | AFGS       | DDG     | DGDG        | DPKQVI<br>G | DSPEF     | DQQM       | ALSG       |  |
| HE-NADKL   | VGQK       | LVPYYS       | MG          | CNL        | RG  | TDDG         | PDBID:2IGP |         |             |             |           |            |            |  |
| PERM       | PAG        |              |             |            |     |              | PLND       | QAP     | CPSY        | DTK         | VGAPH     |            |            |  |
| PDBID:3GBQ |            |              |             |            |     |              | PDBID:2PK7 |         |             |             |           |            |            |  |
| ADD        | KRG        | QN           | NG          |            |     |              | CPICK      | SADK    | DG          | CPICK       | SADK      | DG         |            |  |
| PDBID:3GK2 |            |              |             |            |     |              | PDBID:2PWS |         |             |             |           |            |            |  |
| EGDKH      | SHFL       | DSDG         |             |            |     |              | GCY        | WG      | NG          | LY          |           |            |            |  |
| PDBID:3GK4 |            |              |             |            |     |              | PDBID:2QAS |         |             |             |           |            |            |  |
| EGDKH      | SHFL       | DSDG         |             |            |     |              | DLMQ       | APGG    | PEPH        | TKAAG<br>V  | YPD       | QHQ        | GET        |  |
| PDBID:3GSP |            |              |             |            |     |              | GG         | FSA     |             |             |           |            |            |  |
| CD         | GS         | GSNS         | NYEG        | LSSG       | ENN | HTGAS<br>GNN | PDBID:2QVT |         |             |             |           |            |            |  |
| PDBID:3HJX |            |              |             |            |     |              | SPTA       | SGL     | NEQM        | QAEE        | GPKL<br>N | SNMD<br>QH | SGAT       |  |
| RPMDEYS    | TT         |              |             |            |     |              | NDIPNF     |         |             |             |           |            |            |  |
| PDBID:3M4T |            |              |             |            |     |              | PDBID:2VKS |         |             |             |           |            |            |  |

|           |               |              |            |      |      |             |  |            |              |            |            |            |              |             |
|-----------|---------------|--------------|------------|------|------|-------------|--|------------|--------------|------------|------------|------------|--------------|-------------|
| GLFC      | ED            | SVA          | SFI        | IVRV |      |             |  | AAA        | AV           | EA         | DV         | DGPG       | TD           | SGA         |
| PDBID:3O  |               |              |            |      |      |             |  | PDBID:3A0  |              |            |            |            |              |             |
| ZZ        |               |              |            |      |      |             |  | S          |              |            |            |            |              |             |
| AK        | HY            | LSE-<br>HPGG | AG         |      |      |             |  | KDG        | VLG          | LPD        | GE         | NAKTQ      |              |             |
| PDBID:3U  |               |              |            |      |      |             |  | PDBID:3BI  |              |            |            |            |              |             |
| NN        |               |              |            |      |      |             |  | A          |              |            |            |            |              |             |
| AH        | MPDCS         | WD           | CGSLN<br>G | RPP  | RDQ  | AD          |  | LG         | PNSKC<br>NA  | DGTR       | STK        | SN         | GWFN         |             |
| PDBID:3V  |               |              |            |      |      |             |  | PDBID:3C4  |              |            |            |            |              |             |
| 19        |               |              |            |      |      |             |  | S          |              |            |            |            |              |             |
| HSI       |               |              |            |      |      |             |  | FPG        | NVDDT<br>YYR | DG         | GN         | FPG        | NVDDT<br>YYR | DG          |
| PDBID:3V  |               |              |            |      |      |             |  | GN         |              |            |            |            |              |             |
| YA        |               |              |            |      |      |             |  |            |              |            |            |            |              |             |
| ED        | DGN           | GGM          | RDE        | RKV  | RN   | IARFK<br>WA |  | PDBID:3C5  |              |            |            |            |              |             |
| PDBID:4A  |               |              |            |      |      |             |  | K          |              |            |            |            |              |             |
| HI        |               |              |            |      |      |             |  | PWCPH      | PAAG         | DVTQ       | CGDCG      | IQE        | LSCY         | GRYING      |
| DAKPQG    | GLTSP-<br>CID | ENKNG        | REN        | GGG  | WPPC | NG          |  | YIDL       | YYCQ         | GEDM       |            |            |              |             |
| R         |               |              |            |      |      |             |  |            |              |            |            |            |              |             |
| PDBID:4A  |               |              |            |      |      |             |  | PDBID:3C7I |              |            |            |            |              |             |
| QI        |               |              |            |      |      |             |  |            |              |            |            |            |              |             |
| GRDG      | DKNE          |              |            |      |      |             |  | HPW        | KI           | HDG        | ESAPG      | GN         | DGAG         | LWV         |
| PDBID:4A  |               |              |            |      |      |             |  | RST        | SRNQ         |            |            |            |              |             |
| QJ        |               |              |            |      |      |             |  |            |              |            |            |            |              |             |
| RRDG      | NYLA          | DKNE         |            |      |      |             |  | PDBID:3DJ  |              |            |            |            |              |             |
| PDBID:4E  |               |              |            |      |      |             |  | N          |              |            |            |            |              |             |
| X0        |               |              |            |      |      |             |  | NHK        | PSE          | PY         | GEDG       |            |              |             |
| TSI       |               |              |            |      |      |             |  | PDBID:3FF  |              |            |            |            |              |             |
|           |               |              |            |      |      |             |  | Y          |              |            |            |            |              |             |
| PDBID:4L  |               |              |            |      |      |             |  | NAT        | PNEK         | PQKK<br>GR | VDE        | GPGR       | KI           |             |
| YO        |               |              |            |      |      |             |  |            |              |            |            |            |              |             |
| LDN       | NF            | TQA          | NTDG       | GILQ | SRWW | DGRTP<br>GS |  | PDBID:3GK  |              |            |            |            |              |             |
|           |               |              |            |      |      |             |  | Y          |              |            |            |            |              |             |
| NLCN      | SSD           | GNGM<br>NAW  | KGTD       | IRGC |      |             |  | HSI        | HSI          | GERG       |            |            |              |             |
| PDBID:4U  |               |              |            |      |      |             |  |            |              |            |            |            |              |             |
| NG        |               |              |            |      |      |             |  | PDBID:3HQ  |              |            |            |            |              |             |
| TSI       | TSI           |              |            |      |      |             |  | B          |              |            |            |            |              |             |
| PDBID:5A  |               |              |            |      |      |             |  | YKH        | NNDE         | NNDE       |            |            |              |             |
| FG        |               |              |            |      |      |             |  | PDBID:3IN  |              |            |            |            |              |             |
|           |               |              |            |      |      |             |  | 2          |              |            |            |            |              |             |
| DAAQQH    | CSND          | VKE          |            |      |      |             |  | AECS       | DQM          | NTN        | DKSCK<br>Q | PKNVM<br>G | TAAD         | GSG         |
| PDBID:5B1 |               |              |            |      |      |             |  |            |              |            |            |            |              |             |
| G         |               |              |            |      |      |             |  | FPGHSALL   |              |            |            |            |              |             |
| LDN       | NF            | TQA          | NTDG       | GILQ | SRW  | DGRTP<br>GS |  | PDBID:3LR  |              |            |            |            |              |             |
|           |               |              |            |      |      |             |  | 0          |              |            |            |            |              |             |
| LCN       | SSD           | NGMN<br>AW   | KGT        | RGC  |      |             |  | DPD        | EKTD         | GDDT       | ND         | DD         |              |             |
| PDBID:5B  |               |              |            |      |      |             |  |            |              |            |            |            |              |             |
| MH        |               |              |            |      |      |             |  | PDBID:3LV  |              |            |            |            |              |             |
|           |               |              |            |      |      |             |  | E          |              |            |            |            |              |             |
| GKTL      |               |              |            |      |      |             |  | PD         | SLG          | SQS        | SSNS       | KPGQ       | WAS          | ESGVPD<br>R |
| PDBID:5C  |               |              |            |      |      |             |  |            |              |            |            |            |              |             |
| 6X        |               |              |            |      |      |             |  | GT         | SS           | QAED<br>V  | YYSTPY     |            |              |             |

[illegible]

|            |         |          |         |         |       |           |            |            |      |       |      |           |         |      |
|------------|---------|----------|---------|---------|-------|-----------|------------|------------|------|-------|------|-----------|---------|------|
| KB         |         |          |         |         |       |           | Y          |            |      |       |      |           |         |      |
| CAN-CEGEG  | CSQCKGG | HFNG     | KAG     | CWLCRGK | CGDCN | GA        | SS         | G          | GCY  | GWG   | VNGA | LYPD-FLCK |         |      |
| PDBID:6I3S |         |          |         |         |       |           | PDBID:4HMB |            |      |       |      |           |         |      |
| EKQQH      | CSND    | VKE      |         |         |       |           | G          | GCY        | WG   | NG    | LY   |           |         |      |
| PDBID:6QJ  |         |          |         |         |       |           | PDBID:4HP9 |            |      |       |      |           |         |      |
| DPRLPDN    | ILG     | GPET     | TKSG    | DQKG    |       |           | FQSR       | ARVENC     | MQ   | CTC   | GPRT | RKDG      | NEDG    |      |
| PDBID:6RNT |         |          |         |         |       |           | PDBID:4HR  | S          |      |       |      |           |         |      |
| CD         | GS      | GSNS     | NYEGFDF | LSSG    | ENN   | HTGASGNN  | GR         | VVGE       | DDD  | GG    | DG   | PEDQ      | VEV     | RLIK |
| PDBID:1B2O |         |          |         |         |       |           | PDBID:4IAS |            |      |       |      |           |         |      |
| TVC        | NPGT    | PDDW     | CPLCA   | TVC     | NPGT  | PDDW      | LDN        | NF         | TQA  | NTDG  | GILQ | SRW       | DGRTPGS |      |
| CPLCA      |         |          |         |         |       |           | LCN        | SSD        | DGN  | KGTD  | RGC  |           |         |      |
| PDBID:1BKF |         |          |         |         |       |           | PDBID:4KUO |            |      |       |      |           |         |      |
| DGRT       | KRG     | EDG      | NK      | GK      | SVG   | ATG       | DPSQPDN    | VLG        | GPDT | RKDG  | DPEG |           |         |      |
| PGI        | PPH     |          |         |         |       |           | PDBID:4LFS |            |      |       |      |           |         |      |
| PDBID:1BPQ |         |          |         |         |       |           | SCI        | RKTCG      |      |       |      |           |         |      |
| IPSS       | NN      | G        | CY      | NPYTN   | NN    | SSEN      | NLDKKN     | PDBID:4ML2 |      |       |      |           |         |      |
| PDBID:1C0C |         |          |         |         |       |           | TLPL       | KG         | PD   | TDK   |      |           |         |      |
| KET        | DSST    | NLT-KDRC | CKNGQTN | KYPN    | GNPY  |           | PDBID:4P9V |            |      |       |      |           |         |      |
| PDBID:1C9H |         |          |         |         |       |           | HPW        | KI         | HDG  | ESAPG | GN   | DGAG      | LWV     |      |
| DGRT       | KKG     | QNG      | SRDRN   | GK      | SLG   | ATG       | SRNQ       |            |      |       |      |           |         |      |
| PGV        | PPN     |          |         |         |       |           | PDBID:4PTA |            |      |       |      |           |         |      |
| PDBID:1DMM |         |          |         |         |       |           | NW         | DTEG       | KRPN |       |      |           |         |      |
| GD         | DPFGQ   | SHNG     | NG      | DEHG    |       |           | PDBID:4XC4 |            |      |       |      |           |         |      |
| PDBID:1DMQ |         |          |         |         |       |           | TSI        |            |      |       |      |           |         |      |
| DPFGQ      | SHNG    | NG       | DEHG    |         |       |           | PDBID:5AEF |            |      |       |      |           |         |      |
| PDBID:1DYZ |         |          |         |         |       |           | GVVI       | GVVI       |      |       |      |           |         |      |
| AQC        | NDAM    | NVK      | DKSCK   | AK-VAMG | GGG   | FPGH-WAMM | PDBID:5CB9 |            |      |       |      |           |         |      |
| PDBID:1DZ0 |         |          |         |         |       |           | PD         | PA         | PG   | AEPP  | GAGE | NDTACCYA  | GP      | GGG  |
| AQC        | NDAM    | NVK      | DKSCK   | AK-VAMG | GGG   | FPGH-WAMM | PDBID:5J6X |            |      |       |      |           |         |      |
| PDBID:1E6M |         |          |         |         |       |           | DN         | KQ         | DN   |       |      |           |         |      |
| SDKEL      | DDF     | WNMPNMD  | DGAMSAL | KPF     |       |           | PDBID:5K2L |            |      |       |      |           |         |      |

LDN      NF      TQA    NTDG   GILQ    SRWW   DGRTP  
GS

|                |        |             |              |            |              |       |             |                |              |            |             |      |            |              |
|----------------|--------|-------------|--------------|------------|--------------|-------|-------------|----------------|--------------|------------|-------------|------|------------|--------------|
| EEW            | KI     | NPEN-PRG    | SETTKG<br>A  | LN         | LD           | SG    | SR          | NLCN           | SSD          | NGMN<br>AW | KGT         | RGC  |            |              |
| ADGLCH<br>R    |        |             |              |            |              |       |             | PDBID:1BO<br>0 |              |            |             |      |            |              |
| PDBID:1K<br>P4 |        |             |              |            |              |       |             | PVGI           | TSSHCP<br>RE | KLD        | KKT         | TPK  |            |              |
| DLCTQA         | NPFGFP |             |              |            |              |       |             | PDBID:1BY<br>L |              |            |             |      |            |              |
| PDBID:1K<br>XW |        |             |              |            |              |       |             | RD             | DD           | DD         | DQVV        | RG   | TNFRD<br>A | PW           |
| LDN            | NF     | TQA         | NTDG         | GILQ       | SRWW         |       | DGRTP<br>GS | DPAG           |              |            |             |      |            |              |
| NLCN           | SSD    | DGN         | KGTD         | RGC        |              |       |             | PDBID:1EIF     |              |            |             |      |            |              |
| PDBID:1LS<br>L |        |             |              |            |              |       |             | KVG            | DG           | IFE        | TSS         | GD   | LQTY       | PEGI         |
| SVTC           | QMNG   | EA          | VTCG         | FGG        | DV           | NK    |             | EPG            | VG           |            |             |      |            |              |
| PDBID:1L<br>YO |        |             |              |            |              |       |             | PDBID:1FK<br>V |              |            |             |      |            |              |
| LDN            | NF     | TQA         | NTDG         | GILQ       | SRWW         |       | DGRTP<br>GS | KD             | GY           | TQA        | NNDS        | GLFQ | NKIW       | DDQNP<br>HS  |
| NLCN           | SSD    | GN          | KGTD         | IRGC       |              |       |             | NICN           |              |            |             |      |            |              |
| PDBID:1O<br>4H |        |             |              |            |              |       |             | PDBID:1GP<br>3 |              |            |             |      |            |              |
| EEW            | KI     | NAENP<br>RG | SETTKG       | NAK        | LD           | SG    | SR          | NPSTG          | SEK          | CG         | NENCP<br>PG | GQTR | KR         | DQ           |
| ADGLCH<br>R    |        |             |              |            |              |       |             | CPSKSGL        | KQTC         |            |             |      |            |              |
| PDBID:1O<br>AP |        |             |              |            |              |       |             | PDBID:1GS<br>3 |              |            |             |      |            |              |
| QQNN           | DLDK   | NPSY        | KEK-<br>PAVL |            |              |       |             | GD             | NPFGQ        | SHNG       | NG          | DEHG |            |              |
| PDBID:1Q<br>TO |        |             |              |            |              |       |             | PDBID:1GS<br>W |              |            |             |      |            |              |
| VD             | DRD    | GD          | TD           | RAV        | DY-<br>ADTSG | PA    |             | AFGSED         | DDG          | GDG        | IG          | DSPE | DYQM       | ALSGD        |
| DPAG           |        |             |              |            |              |       |             | PDBID:1HF<br>X |              |            |             |      |            |              |
| PDBID:1R<br>MD |        |             |              |            |              |       |             | NDLAG          | GY           | TQA        | SD          | GLFQ | DKDF       | NICD         |
| CQICE          | LAD    | TSCK        | CPSCR        | AQDC       |              |       |             | PDBID:1I9E     |              |            |             |      |            |              |
| PDBID:1S<br>V9 |        |             |              |            |              |       |             | EG             | YPRQ         | VNG        | KSNS        | AS   | HWSDS      | FA           |
| SS             | GCY    | GWG         | NG           | LY         |              |       |             | PDBID:1IG<br>U |              |            |             |      |            |              |
| PDBID:1U<br>3Y |        |             |              |            |              |       |             | DPD            | EDDG         | DE         | LN          | AEG  | EDDG       | DPD          |
| DRT            | VTG    | KD          | RQF          | YKDVN<br>I |              | RKSDL |             | LKK            | DE           | LN         | PPAEG       |      |            |              |
| PDBID:1UI<br>E |        |             |              |            |              |       |             | PDBID:1IR8     |              |            |             |      |            |              |
| LDN            | NF     | TQA         | NTDG         | GILQ       | SRWW         |       | DGRTP<br>GS | LDN            | NF           | TQA        | NTDG        | GILQ | SRWW       | DGRTP<br>GS  |
| NLCN           | SSD    | DGN         | KGT          | RGC        |              |       |             | NLCN           | SSD          | DGN        | KGTD        | RGC  |            |              |
| PDBID:1UI<br>F |        |             |              |            |              |       |             | PDBID:1JOI     |              |            |             |      |            |              |
| LDN            | NF     | TQA         | NTDG         | GILQ       | SRWW         |       | DGRTP<br>GS | AEC            | TDQM         | DKSCK      | PKNVM<br>G  | GAG  | AAGT       | FPGHIS<br>MM |

|            |        |          |         |        |        |       |            |            |         |         |         |      |      |         |  |
|------------|--------|----------|---------|--------|--------|-------|------------|------------|---------|---------|---------|------|------|---------|--|
| NLCN       | SSD    | GN       | KGTD    | RGC    |        |       |            | PDBID:1K58 |         |         |         |      |      |         |  |
| PDBID:1W2L |        |          |         |        |        |       |            | DAKPQGR    | LTSPCKD | ENKN    | REN     | WPPC | NG   | HQSIFR  |  |
| SIDG       | RLVGP  | FKGLYG   | EDG     | QPGAKV | QGYPNV |       |            | PDBID:1KJT |         |         |         |      |      |         |  |
| PDBID:1WJX |        |          |         |        |        |       |            | YPD        | APKARI  | LDKK    | SDL     | RAED | NNV  | PTSA    |  |
| FTGS       | DG     | NL       | PVDPR   | LGKVE  | KG     | NERG  | EEDF       |            |         |         |         |      |      |         |  |
| PDBID:1Y49 |        |          |         |        |        |       |            | PDBID:1KXY |         |         |         |      |      |         |  |
| FCNAFTG    |        |          |         |        |        |       |            | LNN        | NF      | TQA     | NTDG    | GILQ | SRWW | DGRTPGS |  |
| PDBID:1Y9T |        |          |         |        |        |       |            | NLCN       | SSD     | DGN     | KGTD    | RGC  |      |         |  |
| FSIPNDL    | TTNK   | SKC      | AG      | VDGC   | NKIN   | DG    | PDBID:1LAC |            |         |         |         |      |      |         |  |
| PDBID:1Z3P |        |          |         |        |        |       |            | KLPD       | EGIH    | KPG     | NEDD    | NDKA | SPVK | LVP     |  |
| NLTKDR     | CKNG   | TGSS     | YP      | GNPY   |        |       |            | VGQT       |         |         |         |      |      |         |  |
| PDBID:2A7B |        |          |         |        |        |       |            | PDBID:1MKU |         |         |         |      |      |         |  |
| NG         | SNTNPS | PKTF     | PAFNT   | NPQK   | KG     | NNF   | IPSS       |            |         |         |         |      |      |         |  |
| PDBID:2AZB |        |          |         |        |        |       |            | PDBID:1NXT |         |         |         |      |      |         |  |
| LWKRP      | GG     | DTGA     | CG      | TPA    |        |       |            | PD         | MLPD    | AD      | KPF     |      |      |         |  |
| PDBID:2B1Y |        |          |         |        |        |       |            | PDBID:1O43 |         |         |         |      |      |         |  |
| RAGT       | KSPI   | AEGH     |         |        |        |       |            | EEW        | KI      | NAENPRG | SETTKG  | NAK  | LDSG | SR      |  |
| PDBID:2BFH |        |          |         |        |        |       |            | NS         | ADGLCHR |         |         |      |      |         |  |
| KNGG       | HPDG   | EKS-DPHI | RG      | VCAN   | KEDG   | KCVTD | EC         | PDBID:1O44 |         |         |         |      |      |         |  |
| ESNN       | RKYTSW | KRTG     | GPGQKAI |        |        |       |            | EEW        | KI      | NAENPRG | SETTKGA | NAK  | LDSG | SR      |  |
| PDBID:2EYW |        |          |         |        |        |       |            | ADGLCHR    |         |         |         |      |      |         |  |
| GAM        | DEED   | KKGD     | KPE     | DSEG   | VPYV   | PASA  | PDBID:1O4A |            |         |         |         |      |      |         |  |
| PDBID:2GV2 |        |          |         |        |        |       |            | EEW        | KI      | NAENPRG | SETTKGA | NAK  | LDSG | SR      |  |
| DEKQQH     | CSND   | VKE      |         |        |        |       |            | ADGLCHR    |         |         |         |      |      |         |  |
| PDBID:2H2B |        |          |         |        |        |       |            | PDBID:1O4I |         |         |         |      |      |         |  |
| GSHM       | PGF    | FG       | NG      | MDNV   | SGK    | WRRT  | EEW        |            |         |         |         |      |      |         |  |
| PDBID:2H36 |        |          |         |        |        |       |            | KI         | NAENPRG | SETTKGA | NAK     | LDSG | SR   |         |  |
| MEKV       | LGNY   | NG       | DDD     | EDN    |        |       |            | PDBID:1Q4V |         |         |         |      |      |         |  |
| PDBID:2IY  |        |          |         |        |        |       |            | GV         | SLYQL   | GERG    | GERG    |      |      |         |  |
| AGDK       | ATWC   | YSN      | VDD     | CMP    | KG     | GAN   | PDBID:1QKF |            |         |         |         |      |      |         |  |

|                |            |             |             |      |            |               |                |             |                |             |             |             |             |      |
|----------------|------------|-------------|-------------|------|------------|---------------|----------------|-------------|----------------|-------------|-------------|-------------|-------------|------|
| PDBID:2O<br>XK |            |             |             |      |            |               | SRR            | VG          | NGKQ           |             |             |             |             |      |
| EK             |            |             |             |      |            |               | PDBID:1R7<br>5 |             |                |             |             |             |             |      |
| PDBID:2P0<br>F |            |             |             |      |            |               | FKNG           | MFSNI       | TEAR           | SKE         | YDS         | LGDT        | IG          |      |
| GG             | GN         | REPPPT<br>A | GWGPA<br>GS | LRGA | GRHLS      | RR            | RPL            | AEDER<br>G  |                |             |             |             |             |      |
| TIPG           |            | DH          |             |      |            |               | PDBID:1RA<br>Q |             |                |             |             |             |             |      |
| PDBID:2P<br>KT |            |             |             |      |            |               | LQCH           | DQGG        | NKVG<br>P      | LHGIFG      | SGQAE<br>GY | IPGT        |             |      |
| TPGS           | CIG        | DG          | TSNM        | CTD  |            |               |                | PDBID:1RBI  |                |             |             |             |             |      |
| PDBID:2Q<br>HE |            |             |             |      |            |               | NLTKDR         | CKNG        | TGSS           | YP          | GNPY        |             |             |      |
| NG             | TYY        |             |             |      |            |               | PDBID:1RB<br>W |             |                |             |             |             |             |      |
| PDBID:2R2<br>Y |            |             |             |      |            |               | DSST           | NLT-<br>KDR | CKNG<br>QTN    | TGSS        | YP          | GNPY        |             |      |
| YL             | GT         | TDDS        | RTSG        | FPDD | PQCPS<br>G | KAGS          | PDBID:1RN<br>N |             |                |             |             |             |             |      |
| EPKT           |            |             |             |      |            |               | DSSTS          | NLT-<br>KDR | CKNG           | TGSS        | YP          | GNPY        |             |      |
| PDBID:2R3<br>4 |            |             |             |      |            |               | PDBID:1RN<br>U |             |                |             |             |             |             |      |
| TSI            | TPK        | TSI         | GERG        |      |            |               | NLTKDR         | CKNG        | TGSS           | YP          | GNPY        |             |             |      |
| PDBID:2R3<br>6 |            |             |             |      |            |               | PDBID:1RN<br>W |             |                |             |             |             |             |      |
| TSI            | GERG       | PKT         | TSI         | LENY | GERG       |               |                |             | DSST           | NLT-<br>KDR | CKNG        | TGSS        | YP          | GNPY |
| PDBID:2S<br>AK |            |             |             |      |            |               | PDBID:1R<br>WJ |             |                |             |             |             |             |      |
| DSKG           | KPG        | TAYKE       | DPSA        | KNKK | TEKG       | LSE-<br>HIKNP | KGMT           | PK          | MKGV           | GMY         | CHT-<br>KLF | KAGAK<br>R  |             |      |
| PDBID:2W<br>OR |            |             |             |      |            |               | PDBID:1S7I     |             |                |             |             |             |             |      |
| RRDD           | NYLA       | DKNE        |             |      |            |               | LA             | LDN         | RG             | NTDG        | GILQ        | SRWW        | DGRTP<br>GS |      |
| PDBID:2W<br>OS |            |             |             |      |            |               | PDBID:1SF<br>G |             |                |             |             |             |             |      |
| RRDD           | NYLA       | DKNE        |             |      |            |               | NLCN           | SSDITA      | NRCK<br>GT     | WIRGC       |             |             |             |      |
| PDBID:2X9<br>C |            |             |             |      |            |               | PDBID:1TD<br>Y |             |                |             |             |             |             |      |
| KPSD           | KPSD       |             |             |      |            |               | MDG            |             |                |             |             |             |             |      |
| PDBID:2X<br>KH |            |             |             |      |            |               | GY             | TRA         | AGDR           | GIFQ        | SRWW        | DGKTP<br>GA |             |      |
| VN             | FGFKG<br>V |             |             |      |            |               | NACH           | QDN         | DPQ            | QNR         | VQGC        |             |             |      |
| PDBID:3A<br>Z5 |            |             |             |      |            |               | PDBID:1TE<br>N |             |                |             |             |             |             |      |
| LDN            | RG         | NF          | TQA         | NTDG | GILQ       | SRWW          | TDT            | KDVPG<br>D  | EDE            | KPDT        | GD          |             |             |      |
| DGRTPGS        | NLCN       | SSD         | NGMN<br>AW  | KGT  | RGC        |               |                |             | PDBID:1VA<br>T |             |             |             |             |      |
| PDBID:3B8<br>4 |            |             |             |      |            |               | LDN            | NF          | TQA            | NTDG        | GILQ        | SRW         | DGRTP<br>GS |      |

|                                 |            |              |        |             |      |              |  |                       |             |             |       |             |      |             |
|---------------------------------|------------|--------------|--------|-------------|------|--------------|--|-----------------------|-------------|-------------|-------|-------------|------|-------------|
| GQYC<br>PDBID:3B<br>YR          | GG         | GDG          | LALTSG |             |      |              |  | LCN<br>PDBID:1YE<br>A | SSD         | DGN         | KGTD  | RGC         |      |             |
| MDEG<br>PDBID:3B<br>ZS          | RGRA       | GP           | RGDT   | FPG         |      |              |  | RC                    | EEGG        | NKVG<br>P   | LHG   | SGQVK<br>GY | IPGT |             |
| ST<br>PDBID:3C<br>12            | PTH        | KLGETP<br>LP | HKG    |             |      |              |  | MPNMD                 | DGAMS<br>AL | EAK         | PF    |             |      |             |
| DATG<br>PDBID:3C<br>TG          | DANG       | DANG         | TAG    | SD          | TGL  | LANV         |  | PDNY                  | VAPGK       | NREG<br>KLP | SG    | NY          | SDW  | TDHYQ<br>T  |
| KE<br>PDBID:3C<br>YI            | KTYC       | ELN          | TVP    | NG          | PVF  |              |  | NLTKDR                | CKNG        | TGSS        | YP    | GNPY        |      |             |
| GAQG<br>PDBID:3H<br>NU          |            |              |        |             |      |              |  | DAKPKGR               | TSPC        | GAN         | REN   | GG          | RPPC | NG          |
| NADG<br>PDBID:3K<br>MJ          | DG         | GG           | GAAE   | DCNG        | LNRI | NG           |  | DAKPKGR               | TSPC        | GAN         | REN   | RPPC        | NG   | ESF         |
| NDR                             | SPLG       | RKS          | EKG    | TALE-<br>DY | KN   | LGF-<br>GAIF |  | ATPGS                 | PPN         | DNDY        | VNN   | SQG         |      |             |
| KDP<br>PDBID:3K<br>Q6           | TAGLK      | IKP          | AIG    | GDD         | RLTQ |              |  | PDBID:2DY<br>Q        |             |             |       |             |      |             |
| HSI<br>PDBID:3L<br>Z2           | HSI        |              |        |             |      |              |  | AR                    | SDSL        | PL          | GRDPH | LGRQS       | QPH  |             |
| LDN                             | NF         | THA          | NTDGS  | GILQ        | SRWW | TPG          |  | DV                    | LIGE        | FSGK        | LYA   | NA          | LTDS | FSEA        |
| NLCN<br>PDBID:3O<br>SE          | SSDI       | GGNG<br>MNAW | KGT    | IRGC        |      |              |  | LRGA                  | GS          | LIGA        | LHGA  | LTNG        | FKGA | LTNA        |
| TWSM<br>PDBID:3R<br>TO          | RF         | DARQD        |        |             |      |              |  | LTEA                  | FDDA        | ITGA        | FSLA  | NPKTG       |      |             |
| TSI<br>PDBID:3S8<br>S           |            |              |        |             |      |              |  | PDBID:2F4<br>G        |             |             |       |             |      |             |
| GQIP<br>TPQTV<br>PDBID:3W<br>IT | RLNDN<br>V | HPRTR        | TS     | HL          | MG   | DIKG         |  | LDN                   | NF          | TQA         | NTDG  | GILQ        | SRWW | DGRTP<br>GS |
| NG<br>PDBID:3W<br>RP            | EE         | PD           | GES    | KD          | GGs  |              |  | NLCN                  | SSD         | NGMN<br>AW  | KGTD  | RGC         |      |             |
|                                 |            |              |        |             |      |              |  | PDBID:2FB<br>0        |             |             |       |             |      |             |
|                                 |            |              |        |             |      |              |  | NET                   | EEG         | SSTRR<br>D  |       |             |      |             |
|                                 |            |              |        |             |      |              |  | PDBID:2FQ<br>L        |             |             |       |             |      |             |
|                                 |            |              |        |             |      |              |  | SHG                   | PAF         | PPNK<br>Q   | PLS   | LNGE        | LRNG |             |
|                                 |            |              |        |             |      |              |  | PDBID:2M6<br>D        |             |             |       |             |      |             |
|                                 |            |              |        |             |      |              |  | CVYP                  |             |             |       |             |      |             |
|                                 |            |              |        |             |      |              |  | PDBID:2M6<br>E        |             |             |       |             |      |             |

|               |            |      |       |      |      |              |  |           |      |      |             |       |          |
|---------------|------------|------|-------|------|------|--------------|--|-----------|------|------|-------------|-------|----------|
| SAA           | LKS        |      |       |      |      |              |  | GC        | CV   | VY   | YP          | PW    | WC       |
| PDBID:3W      |            |      |       |      |      |              |  | PDBID:2M6 |      |      |             |       |          |
| X4            |            |      |       |      |      |              |  | G         |      |      |             |       |          |
| AG            | APGK       |      |       |      |      |              |  | GCPD      |      |      |             |       |          |
| PDBID:4D      |            |      |       |      |      |              |  | PDBID:2OL |      |      |             |       |          |
| P1            |            |      |       |      |      |              |  | I         |      |      |             |       |          |
| ADDGSLA       | PS         | PAG  | SEED  | AKG  | CSPH | GM           |  | GCY       | NG   | LY   |             |       |          |
| PDBID:4F1     |            |      |       |      |      |              |  | PDBID:2P6 |      |      |             |       |          |
| A             |            |      |       |      |      |              |  | V         |      |      |             |       |          |
| TSI           |            |      |       |      |      |              |  | TPD       |      |      |             |       |          |
| PDBID:4IP     |            |      |       |      |      |              |  | PDBID:2PW |      |      |             |       |          |
| 1             |            |      |       |      |      |              |  | 5         |      |      |             |       |          |
| KGK           | ADWC       | FSD  | ADT   | VTAN | GLP  | DGQG         |  | GD        | KG   | LL   | ETKVE<br>KY | AKK   | DKYG DG  |
| PDBID:4O      |            |      |       |      |      |              |  | KG        |      |      |             |       |          |
| V1            |            |      |       |      |      |              |  | PDBID:2PY |      |      |             |       |          |
| DQDKC         | APEL       | DDYG | KGDG  | PAD  | CPEN |              |  | K         |      |      |             |       |          |
| PDBID:4O      |            |      |       |      |      |              |  | GD        | KG   | LL   | ETKVE<br>KY | AKK   | DKYG DG  |
| ZL            |            |      |       |      |      |              |  | KG        |      |      |             |       |          |
| ADTP          | EKGD       | VRTG |       |      |      |              |  | PDBID:2PZ |      |      |             |       |          |
| PDBID:4P      |            |      |       |      |      |              |  | W         |      |      |             |       |          |
| AZ            |            |      |       |      |      |              |  |           |      |      |             |       |          |
| AE            | PA         | NPG  | VDK   | IKDM | PEGA | KINE         |  | GD        | KG   | LL   | ETKVE<br>KY | AKK   | DKYG DG  |
| CTAH          | GDSP       |      |       |      |      |              |  | KG        |      |      |             |       |          |
| PDBID:4TS     |            |      |       |      |      |              |  | PDBID:2RK |      |      |             |       |          |
| 8             |            |      |       |      |      |              |  | N         |      |      |             |       |          |
| QDPES         | DPQLL<br>G | VKNP | GQYQE | RKTS |      |              |  | CG        | KENP | YKNS | PT          | TC    |          |
| PDBID:4X      |            |      |       |      |      |              |  | PDBID:2RN |      |      |             |       |          |
| XL            |            |      |       |      |      |              |  | S         |      |      |             |       |          |
| GVDK          | KDGP       | RGK  | FPDG  | INGK |      |              |  | NLTKDR    | CKNG | TGSS | YP          | GNPY  |          |
| PDBID:5B5     |            |      |       |      |      |              |  | PDBID:2VJ |      |      |             |       |          |
| 2             |            |      |       |      |      |              |  | W         |      |      |             |       |          |
| RLA           |            |      |       |      |      |              |  | AV        | EA   | DV   | DGPG        | TD    | SGA      |
| PDBID:5E      |            |      |       |      |      |              |  | PDBID:2VP |      |      |             |       |          |
| R4            |            |      |       |      |      |              |  | 7         |      |      |             |       |          |
| EGDKH         | SHFL       | DSDG |       |      |      |              |  | SSSD      | GICT | NDDQ | EASC        | EAS   | CDTCM TE |
| PDBID:5G      |            |      |       |      |      |              |  | GQVETIVS  |      |      |             |       |          |
| SP            |            |      |       |      |      |              |  |           |      |      |             |       |          |
| CD            | GS         | GSNS | NYEG  | LSSG | ENN  | HTGAS<br>GNN |  | PDBID:2XD |      |      |             |       |          |
| PDBID:5L      |            |      |       |      |      |              |  | Y         |      |      |             |       |          |
| AZ            |            |      |       |      |      |              |  | GSKANEG   | HQ   | PRK  | TFGV        | STKG  |          |
| EKQQH         | CSND       | VKE  |       |      |      |              |  | PDBID:2XF |      |      |             |       |          |
|               |            |      |       |      |      |              |  | E         |      |      |             |       |          |
| PDBID:5U      |            |      |       |      |      |              |  | VNG       | GG   | TG   | NG          | TGV   | NN GG    |
| ES            |            |      |       |      |      |              |  |           |      |      |             |       |          |
| DVEAL-<br>GLH | IKHP       | PPDH |       |      |      |              |  | HCN       |      |      |             |       |          |
| PDBID:5YI     |            |      |       |      |      |              |  | PDBID:2XM |      |      |             |       |          |
| 1             |            |      |       |      |      |              |  | U         |      |      |             |       |          |
| ATNDERV       |            |      |       |      |      |              |  | VPTI      | DAQA | LTSK | VPTI        | EDAQA | LTSK     |
| PDBID:6C      |            |      |       |      |      |              |  | PDBID:2YX |      |      |             |       |          |
| ED            |            |      |       |      |      |              |  | Y         |      |      |             |       |          |

|             |         |          |         |       |        |           |            |         |       |      |        |          |         |
|-------------|---------|----------|---------|-------|--------|-----------|------------|---------|-------|------|--------|----------|---------|
| CPH         | PAAG    | DVTQ     | CGDCG   | IQE   | LSCY   | GRYINGHPG | EG         | GV      | LKG   |      |        |          |         |
| YIDL        | YYCQ    |          |         |       |        |           | PDBID:2Z7J |         |       |      |        |          |         |
| PDBID:6FGL  |         |          |         |       |        |           | IYFA       | GHR     | DPNE  | YLDY | AEKS   | APGQA    | HGR     |
| HDAAWPFL    | NPRLVSG | IKNP     | EDDS    |       |        |           | PDBID:3A0D |         |       |      |        |          |         |
| PDBID:6H0K  |         |          |         |       |        |           | SPN        | TG      | GPS   | QGDC | SG     | TGGLGSGC | HNNG    |
| LDN         | NF      | TQA      | NTDG    | GILQ  | SRWW   | DGRTPGS   | DQSN       | QQDR    |       |      |        |          |         |
| NLCN        | SSD     | DGNGMNAW | KGTD    | IRGC  |        |           | PDBID:3ADY |         |       |      |        |          |         |
| PDBID:155C  |         |          |         |       |        |           | NLTIP      | PSVP    | PNSQ  |      |        |          |         |
| NEG         | KCKAC   | GKT      | NPDL    | GKN   | AXXXX  |           | PDBID:3BF2 |         |       |      |        |          |         |
| PDBID:1ANG  |         |          |         |       |        |           | LTYR       | DAAGA   | VTAVI | RG   |        |          |         |
| QDN         | DAKPQGR | GLTSPCKD | ENKN    | REN   | WPPC   | NG        | PDBID:3FZA |         |       |      |        |          |         |
| PDBID:1AQT  |         |          |         |       |        |           | NP         | KTWC    | TVP   | GG   |        |          |         |
| AEQ         | SEG     | YPGH     | QHG     | PG    | SHG    |           | PDBID:3I7T |         |       |      |        |          |         |
| PDBID:1BXY  |         |          |         |       |        |           | SR         | GP      | TD    | KIR  | LIAPGL |          |         |
| PIGY        | RLQ     | PIGY     | RLQ     | AHL   |        |           | PDBID:3I7Y |         |       |      |        |          |         |
| PDBID:1C DP |         |          |         |       |        |           | DSSTS      | NLT-KDR | KP    | CKNG | TGSS   | YP       | GNPY    |
| FAGVL       | AADS    | GLTSK    | DQDK    | FKADA | DSDG   |           | PDBID:3IJU |         |       |      |        |          |         |
| PDBID:1C DT |         |          |         |       |        |           | LDN        | NF      | TQA   | NTDG | GILQ   | SRW      | DGRTPGS |
| KLIPIA      | PEGKN   | ASKKM    | SAL     | TDRC  | KLIPIA | PEGK      | LCN        | SSD     | DGN   | KGTD | RGC    |          |         |
| ASKKM       | NVC     | SAL      | TDRC    |       |        |           | PDBID:3JTE |         |       |      |        |          |         |
| PDBID:1D PY |         |          |         |       |        |           | CNSI       | MKMPKLS | TPHM  | GHG  | KPV    |          |         |
| GCY         | PG      | NPNIK    | QP      | DSAD  | ML     | STSC      | PDBID:3MAZ |         |       |      |        |          |         |
| PDBID:1D Q7 |         |          |         |       |        |           | PAC        | GSDS    | IDI   | GQ   | LEKP   | RGNLR    |         |
| GDN         | PY      | PTPVP    | DGDN    | PY    | PTPV   |           | PDBID:3NGR |         |       |      |        |          |         |
| PDBID:1F1W  |         |          |         |       |        |           | QSGP       | KN      | ATN   | QPGT | DVGRNV | SVES     |         |
| EEW         | KI      | NPEN-PRG | SETTKGA | NAK   | LDSG   | SR        | PDBID:3R5P |         |       |      |        |          |         |
| ADGLCHR     |         |          |         |       |        |           | TFQK       | GRKTG   | GG    | AEKN | KK     |          |         |
| PDBID:1FLU  |         |          |         |       |        |           | PDBID:3RH1 |         |       |      |        |          |         |
| LDN         | NF      | TQA      | NTDG    | GILQ  | SRWW   | DARTPGS   | DSST       | NLT-KDR | CKNG  | TGSS | YP     | GNAY     |         |
| NLCN        | SSD     | DGNGMNAW | KGTD    | RGC   |        |           | PDBID:3RSK |         |       |      |        |          |         |
| PDBID:1FLW  |         |          |         |       |        |           | DSST       | NLT-KDR | CANG  | TGSS | YP     | GNPY     |         |
| LDN         | NF      | TQA      | NTDG    | GILQ  | SRWW   | DGRTP     | PDBID:3S3  |         |       |      |        |          |         |

|            |       |             |              |       |      |             |                     |                         |      |                  |        |      |      |             |  |
|------------|-------|-------------|--------------|-------|------|-------------|---------------------|-------------------------|------|------------------|--------|------|------|-------------|--|
|            |       |             |              |       |      |             | AS                  | Y                       |      |                  |        |      |      |             |  |
| NLCN       | SSD   | GNGM<br>NAW | KGTD         | RGC   |      |             |                     | GS                      | RTNG | LNSV             | DG     | GSS  | TRAQ | DG          |  |
|            |       |             |              |       |      |             |                     | PDBID:3ZK0              |      |                  |        |      |      |             |  |
| PDBID:1HQB | PVSEF | WDT         |              |       |      |             |                     | SPGAE                   | SDSM | EA               | DG     | DR   | PAH  | KSGG        |  |
| PDBID:1HSQ |       |             |              |       |      |             |                     | KL                      | KQG  | AH               |        |      |      |             |  |
| AQREDEL    | IKS   | EGG         | YGCK         |       |      |             |                     | PDBID:4ET8              |      |                  |        |      |      |             |  |
| PDBID:1I07 |       |             |              |       |      |             |                     | LDN                     | NF   | TQA              | NTDG   | GILQ | SRW  | DGRTP<br>GS |  |
| NSS        | MKD   | ASG         | NNI          | ARN   | SEM  | MKD         | NASG                | LCN                     | SSD  | DGNG<br>MNA<br>W | KGTD   | RGC  |      |             |  |
|            |       |             |              |       |      |             |                     | PDBID:4FC1              |      |                  |        |      |      |             |  |
| NNI        |       |             |              |       |      |             |                     | PGDYA                   |      |                  |        |      |      |             |  |
| PDBID:1IR7 |       |             |              |       |      |             |                     | PDBID:4FDX              |      |                  |        |      |      |             |  |
| LDN        | NF    | TQA         | NTDG         | GILQ  | SRWW | DGRTP<br>GS | GVEHFAG             |                         |      |                  |        |      |      |             |  |
| NLCN       | SSD   | DGN         | KGTD         | RGC   |      |             |                     | PDBID:4IP6              |      |                  |        |      |      |             |  |
| PDBID:1ISU |       |             |              |       |      |             |                     | PDBID:4N0Z              |      |                  |        |      |      |             |  |
| NG         | AQ    | GASP-<br>TA | KV           | PGDNQ | APGG | CDAF        | KGK                 | ADWC                    | FSD  | ADT              | VTAN   | GLP  | DGQG |             |  |
| NG         | AQ    | SPTA        | KV           | PGDNQ | APGG | CDAF        | NIKTECIEKN<br>SVPNK |                         |      |                  |        |      |      |             |  |
| PDBID:1IZA |       |             |              |       |      |             |                     | PDBID:4WB<br>F          |      |                  |        |      |      |             |  |
| TSI        | SLYQL | FVN         | TSI          |       |      |             |                     | KER                     | ATN  | APGT             | SIDENA |      |      |             |  |
| PDBID:1LCJ |       |             |              |       |      |             |                     | PDBID:4YX5              |      |                  |        |      |      |             |  |
| EPW        | FKNL  | APGNT<br>HG | SES-<br>TAGS | QNQ   | DNG  | PR          | PTN                 | ANGV                    | ND   | YA               | VEG    |      |      |             |  |
| SDGLCTR    |       |             |              |       |      |             |                     | PDBID:5FG4              |      |                  |        |      |      |             |  |
| PDBID:1LPI |       |             |              |       |      |             |                     | DTGNIFS<br>IKKP<br>AKDT |      |                  |        |      |      |             |  |
| LDN        | NF    | TQA         | NTDG         | GILQ  | SRWW | DGRTP<br>GS | PDBID:5HBO          |                         |      |                  |        |      |      |             |  |
| NLCN       | SSD   | DGN         | KGTD         | RGC   |      |             |                     | IP                      | HE   | APA              | ED     |      |      |             |  |
| PDBID:1M4A |       |             |              |       |      |             |                     | PDBID:5MX<br>Y          |      |                  |        |      |      |             |  |
| KKA        | RPR   |             |              |       |      |             |                     | GVDG                    | KFAD | PEM              | FKEKL  |      |      |             |  |
| PDBID:1MLI |       |             |              |       |      |             |                     | PDBID:6BS<br>Y          |      |                  |        |      |      |             |  |
| IAGH       | HPSS  | IAGH        | HPSS         | IAGH  | HPSS | IAGH        | NPE                 |                         |      |                  |        |      |      |             |  |
| HPSS       | IAGH  | HPSS        | IAGH         | HPSS  | IAGH | HPSS        | PDBID:6I5A          |                         |      |                  |        |      |      |             |  |
| IAGH       | HPSS  | IAGH        | HPSS         | IAGH  | HPSS |             |                     |                         |      |                  |        |      |      |             |  |
| PDBID:1NN7 |       |             |              |       |      |             |                     | QFQT                    | QVTV | PDS              | RYN    | DT   | ENQA | GTG         |  |
| SG         | YPD-  | PRHE        | LIPE         |       |      |             |                     |                         |      |                  |        |      |      |             |  |

TLLGS
